# Supplementary material for: 25-hydroxycholesterol contributes to cerebral inflammation of X-linked adrenoleukodystrophy through activation of the NLRP3 inflammasome
Source: PubMed Central journal article supplement (PMC5093305; doi:10.1038/ncomms13129), 2016-10-25
Supplement: ncomms13129-s1.pdf [file ncomms13129-s1.pdf]

## Supplementary Information:

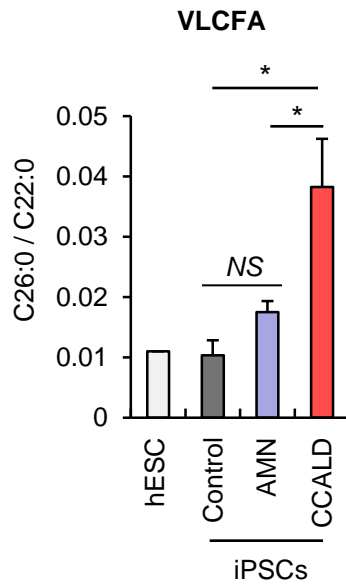

**Supplementary Figure 1. Elevated level of VLCFA in the CCALD-iPSCs.** VLCFA levels in human embryonic stem cells (hESCs) and iPSCs derived from the fibroblasts of controls, AMN patients, or CCALD patients. \* $P < 0.05$  ( $n = 4$ ). NS, not significant.

**Microarray comparison  
in hESCs, control-iPSCs, AMN-iPSCs, and CCALD-iPSCs**

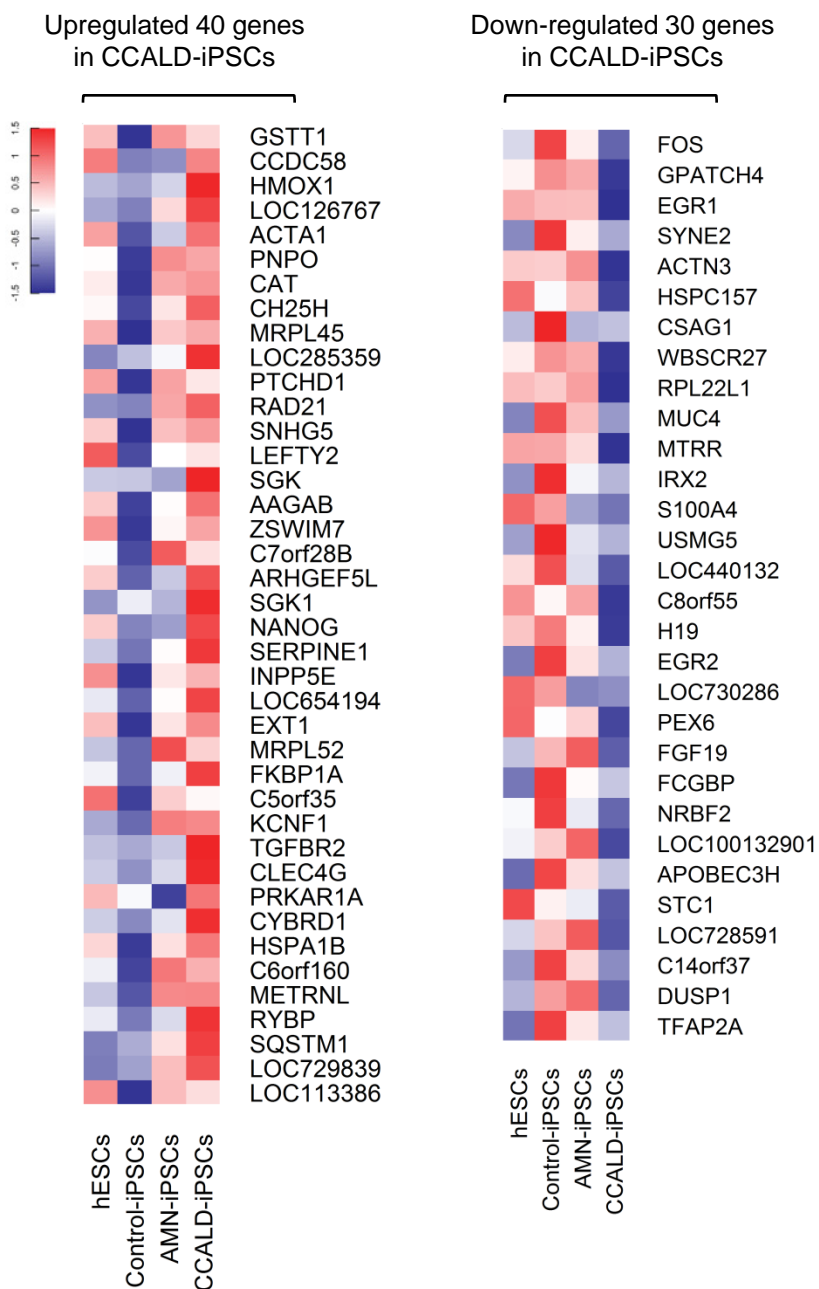

**Supplementary Figure 2. Microarray analysis of control-iPSCs and X-ALD-iPSCs.** Based on microarray analysis, up-regulated or down-regulated genes showing more than two-fold changes in CCALD-iPSCs compared with control-iPSCs were selected. Heatmap of up-regulated (left) and down-regulated (right) candidate genes in CCALD-iPSCs. Red and blue colors indicate up- or down-regulation, respectively.

**a**

**CCALD-OPC**

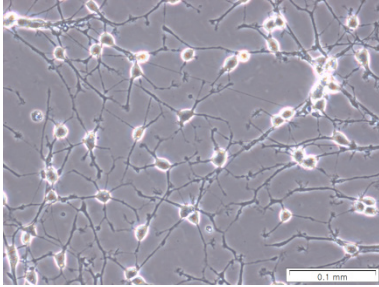

**b**

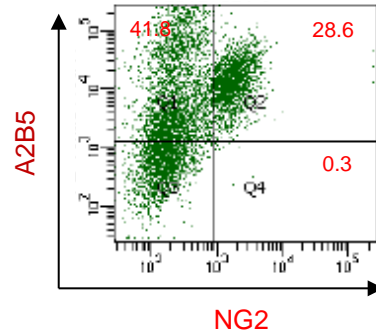

**Supplementary Figure 3. Generation of CCALD-iPSCs-derived oligodendrocyte precursor cells (CCALD-OPC).** (a) A representative phase contrast image of CCALD-OPC. Scale bars, 20  $\mu$ m. (b) Representative fluorescence-activated cell sorted plots of CCALD-OPCs differentiated from CCALD-iPSCs after co-staining with anti-A2B5 and anti-NG2 antibodies, as indicated.

**a**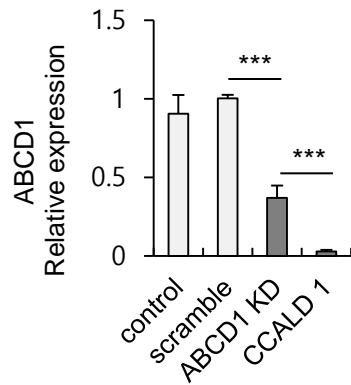**b**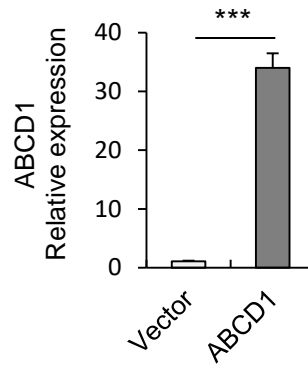

**Supplementary Figure 4. Quantification of ABCD1 mRNA production after knockdown or ectopic expression of ABCD1.** (a) Control fibroblasts were untransfected or transfected with scrambled or ABCD1-targeting siRNA. (b) CCALD-fibroblasts were infected with lentiviral particles expressing control vector or *ABCD1*. (a,b) Relative expression of *ABCD1* mRNA was then determined. a, \*\*\* $P < 0.001$  ( $n = 6$ ); b, \*\*\* $P < 0.001$  ( $n = 5$ ).

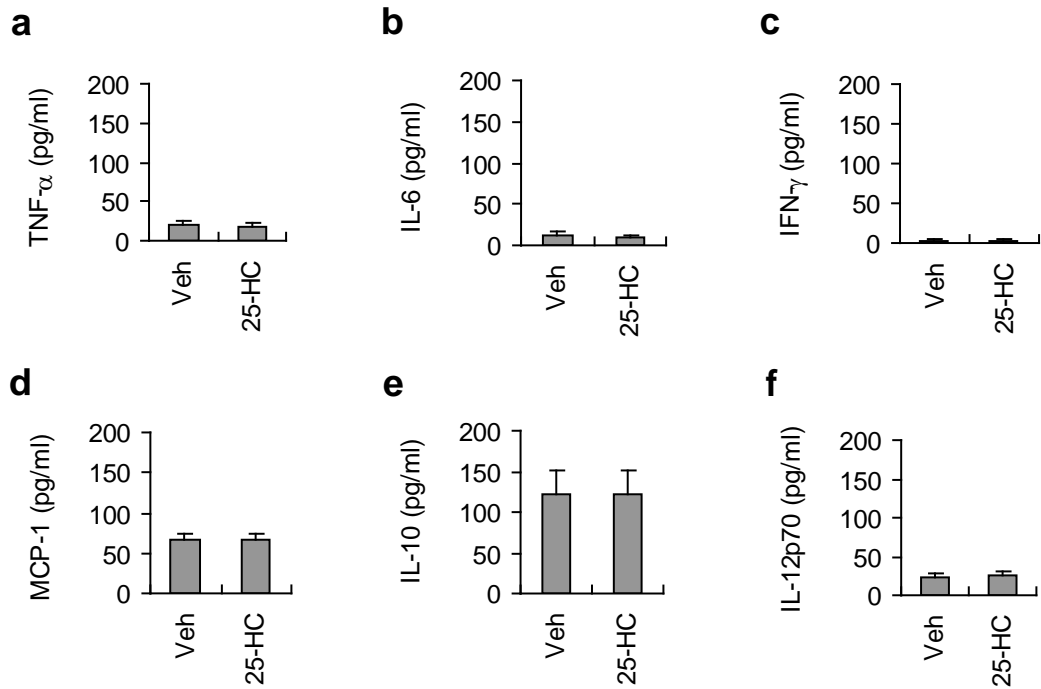

**Supplementary Figure 5. Quantification of inflammatory cytokines in brain homogenates after stereotaxic injection of 25-HC.** (a-f) Vehicle or 25-HC (100  $\mu$ M) were stereotaxically injected into the corpus callosum of mouse brains. Three days after injection, mice were sacrificed, and the brain homogenates were assayed for inflammatory cytokines using a mouse inflammation cytometric bead array kit. ( $n = 8$ )

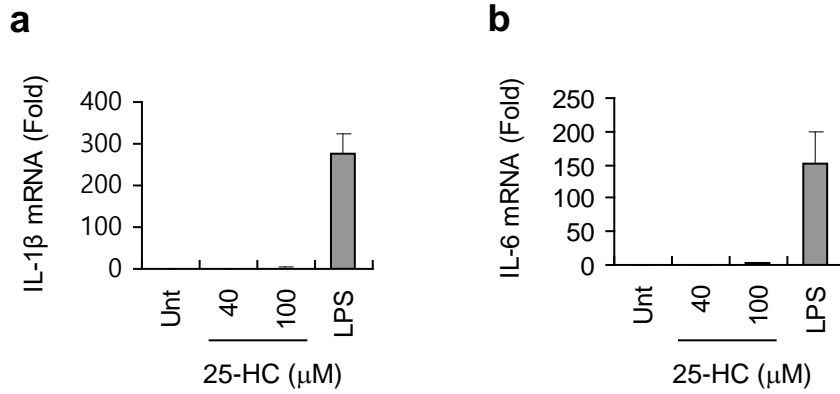

**Supplementary Figure 6. 25-HC does not induce the mRNA production of IL-1 $\beta$  and IL-6. (a,b)** Mouse BMDMs were treated with 25-HC at indicated concentrations for 10 h or LPS (0.25  $\mu$ g ml<sup>-1</sup>) for 4 h. mRNA expression of IL-1 $\beta$  and IL-6 was quantified by quantitative real-time PCR. ( $n = 3$ )

**a**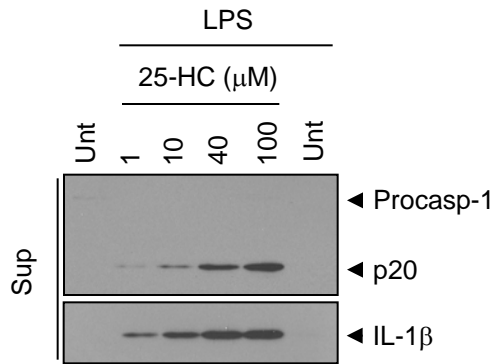**b**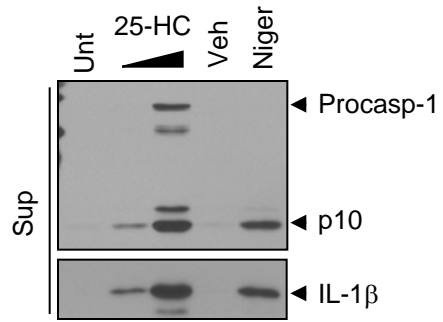

**Supplementary Figure 7. 25-HC promotes robust caspase-1 activation.** (a) Immunoblots of culture supernatants from the primary mixed glial cultures treated with 25-HC at indicated concentrations for 10 h in the presence of LPS (last 4 h). (b) Immunoblots of culture supernatants from PMA-differentiated THP-1 cells treated with 25-HC (50 or 100 µM, 10 h) or treated with nigericin (5 µM, 1 h).

**a**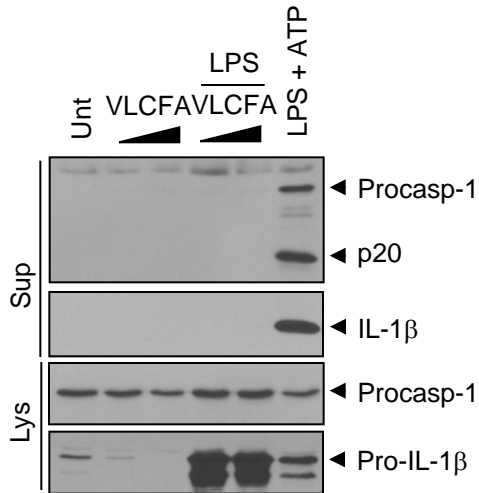**b**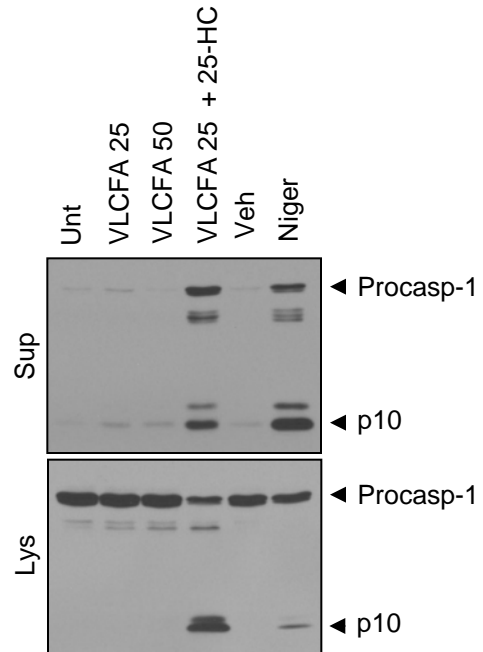

**Supplementary Figure 8. VLCFA does not promote the caspase-1 activation.** (a) Immunoblots of supernatant fractions (Sup) or cellular lysates (Lys) of mouse primary mixed glial cells treated with VLCFA (10 or 25  $\mu$ M, 8 h) in the presence of LPS, or treated with LPS followed by ATP. (b) Immunoblots of PMA-differentiated THP-1 cells treated with VLCFA (25 or 50  $\mu$ M, 10 h) in the presence of 25-HC (100  $\mu$ M), or with nigericin (5  $\mu$ M, 1 h).



**a**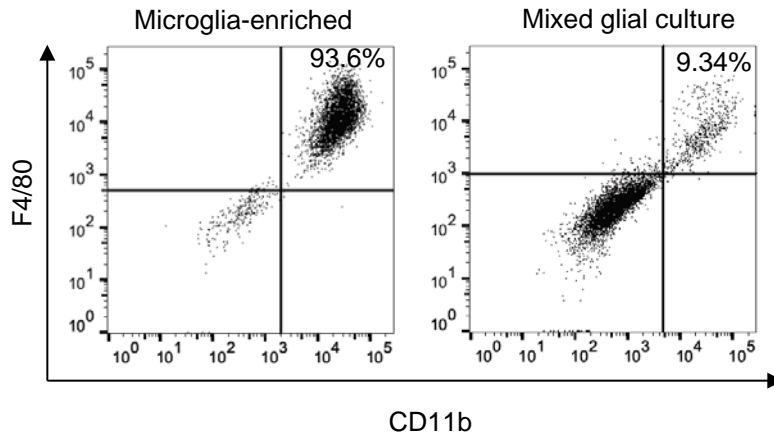**b**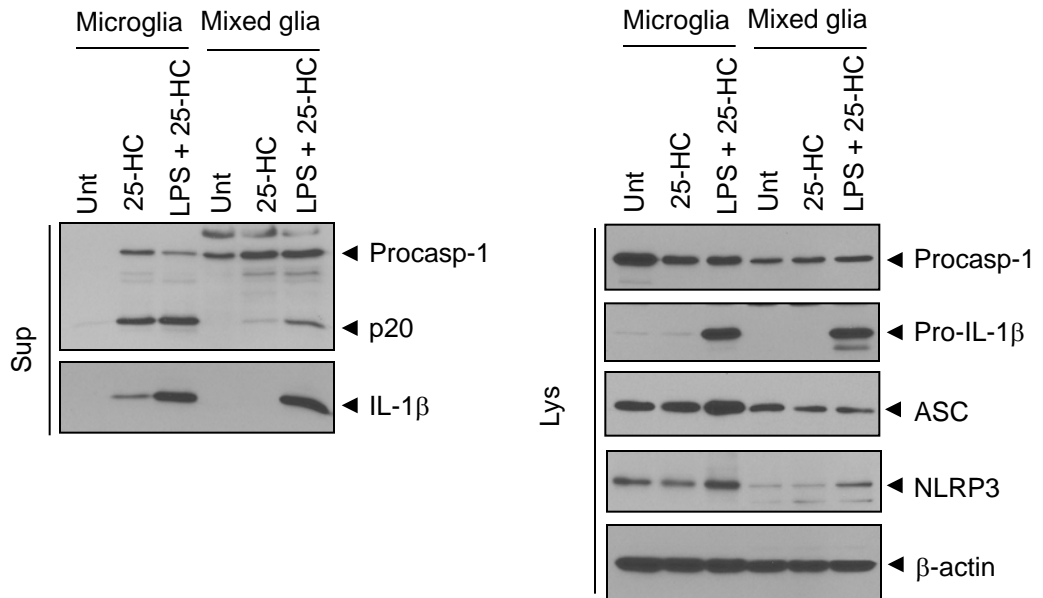

**Supplementary Figure 9. 25-HC promotes inflammasome activation in mouse primary microglia and mixed glial cells.** (a) Flow cytometric analysis of microglia-enriched population or mixed glial cultures after co-staining with anti-CD11b-PE and anti-F4/80-APC antibodies. (b) Immunoblots of culture supernatants (Sup) or cellular lysates (Lys) from microglia or mixed glial cells untreated or treated with 25-HC (100  $\mu$ M, 10 h) in the presence or absence of LPS (4 h).

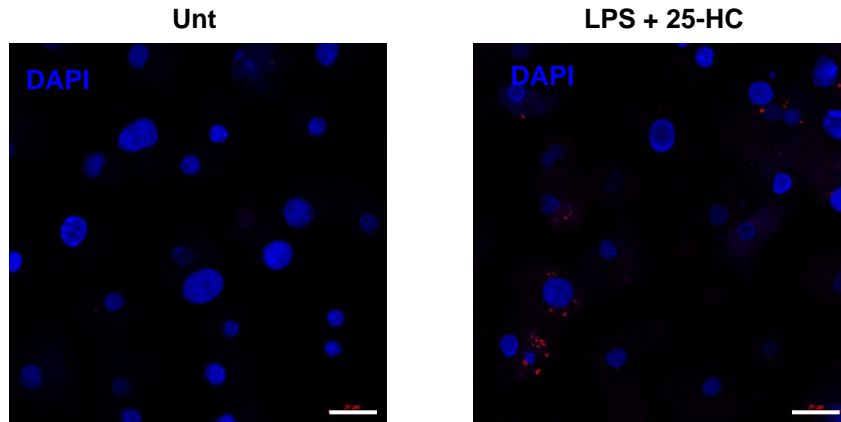

**Supplementary Figure 10. 25-HC triggers a molecular association between NLRP3 and ASC by Proximity ligation assay.** Mouse BMDMs were untreated or treated with 25-HC (80  $\mu$ M, 10 h) in the presence of LPS (final 4 h). Proximity ligation assays were then performed. The red color indicates the proximity of NLRP3 and ASC. DAPI represents nuclei (blue). Scale bars, 20  $\mu$ m.

**a**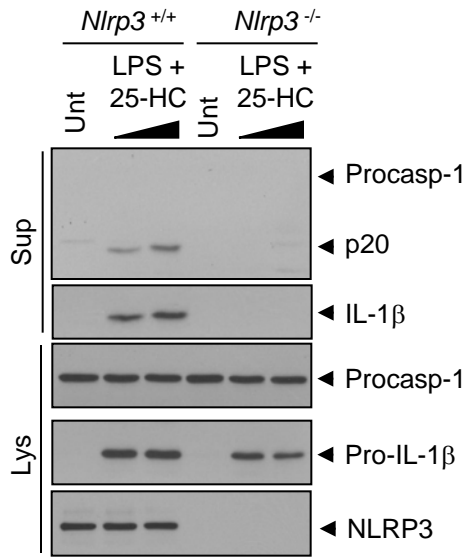**b**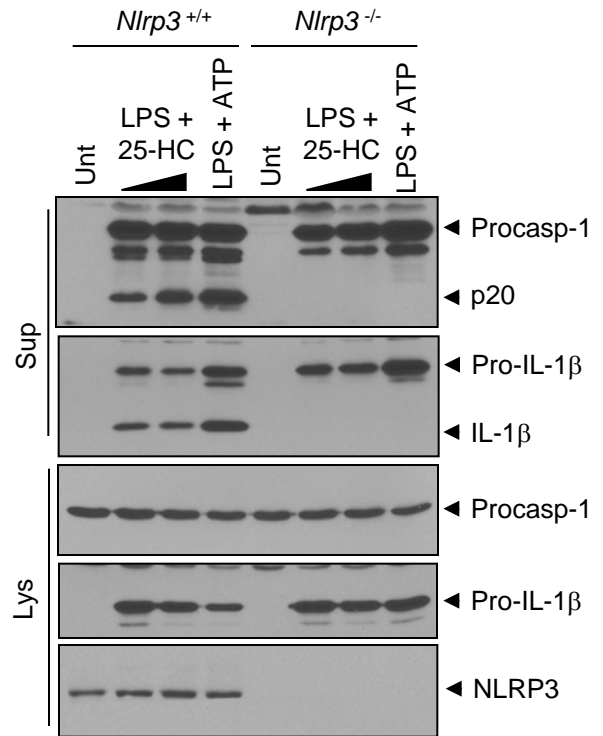**c**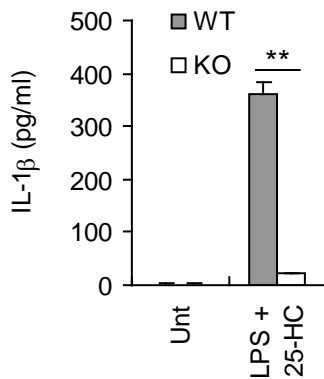**d**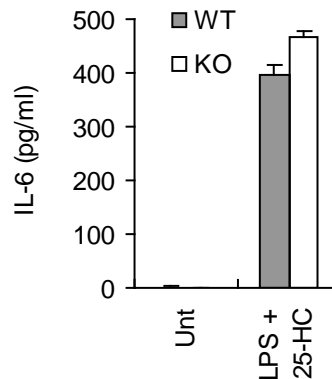

**Supplementary Figure 11. 25-HC promotes NLRP3-dependent caspase-1/IL-1β signaling.** (a) *Nlrp3*<sup>+/+</sup> or *Nlrp3*<sup>-/-</sup> microglial cells were treated with 25-HC (20 or 50 μM, 10 h) in the presence of LPS and culture supernatants (Sup) or cellular lysates (Lys) were analyzed by immunoblot. (b) Immunoblots of supernatant fractions (Sup) or cellular lysates (Lys) from *Nlrp3*<sup>+/+</sup> or *Nlrp3*<sup>-/-</sup> mixed glial cells treated with 25-HC (40 or 100 μM, 10 h) in the presence of LPS (last 4 h), or treated with LPS, followed by ATP. (c,d) Quantification of IL-1β (c) or IL-6 (d) from supernatant fractions of *Nlrp3*<sup>+/+</sup> (WT) or *Nlrp3*<sup>-/-</sup> (KO) BMDMs treated with 25-HC (50 μM, 10 h) in the presence of LPS (last 4 h). Unt, untreated. \*\**P*<0.01 (*n* = 3).

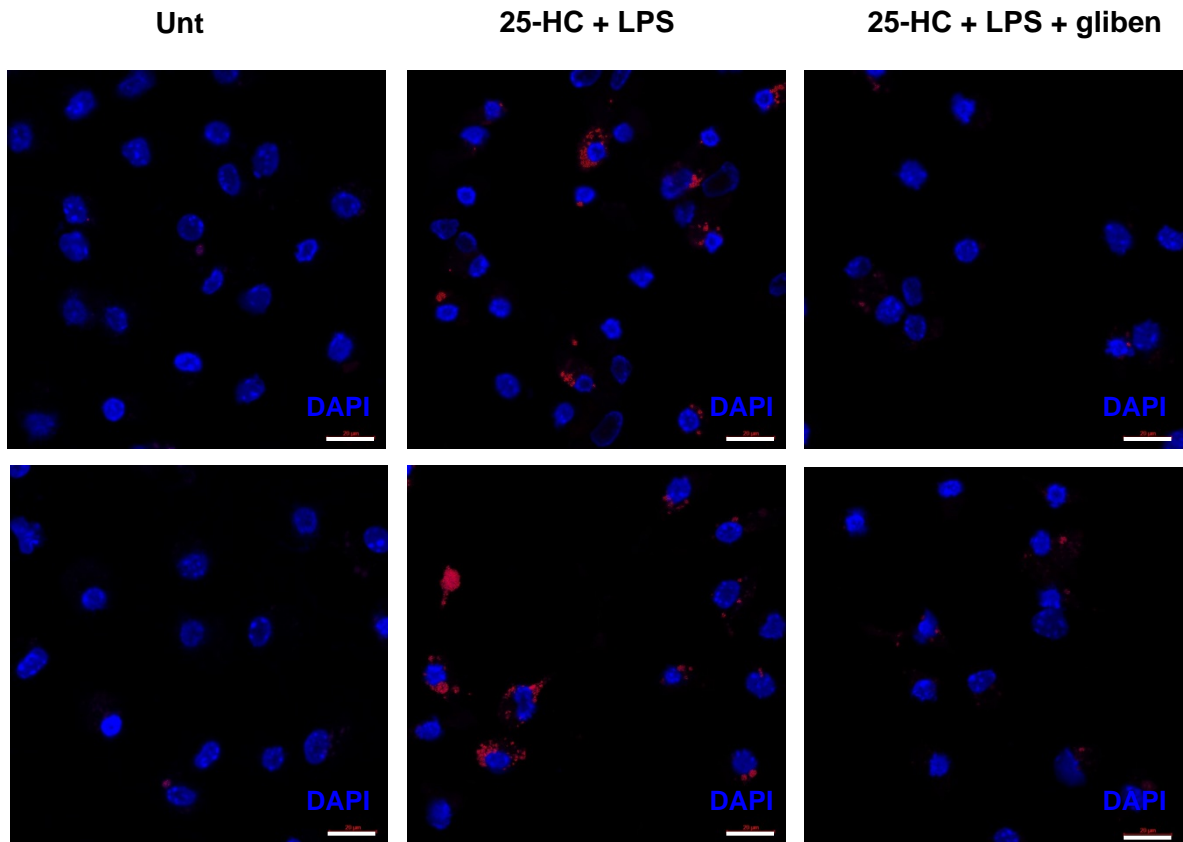

**Supplementary Figure 12. Inhibition of potassium efflux attenuates the molecular assembly of NLRP3 with ASC.** Mouse microglial cells were untreated or treated with 25-HC (80  $\mu$ M, 10 h) together with glibenclamide (50  $\mu$ M, 10 h) in the presence of LPS (last 4 h). Proximity ligation assays were then performed. The red color indicates the proximity of NLRP3 and ASC. Representative images of two independent samples are shown. DAPI represents nuclei (blue). Scale bars, 20  $\mu$ m.

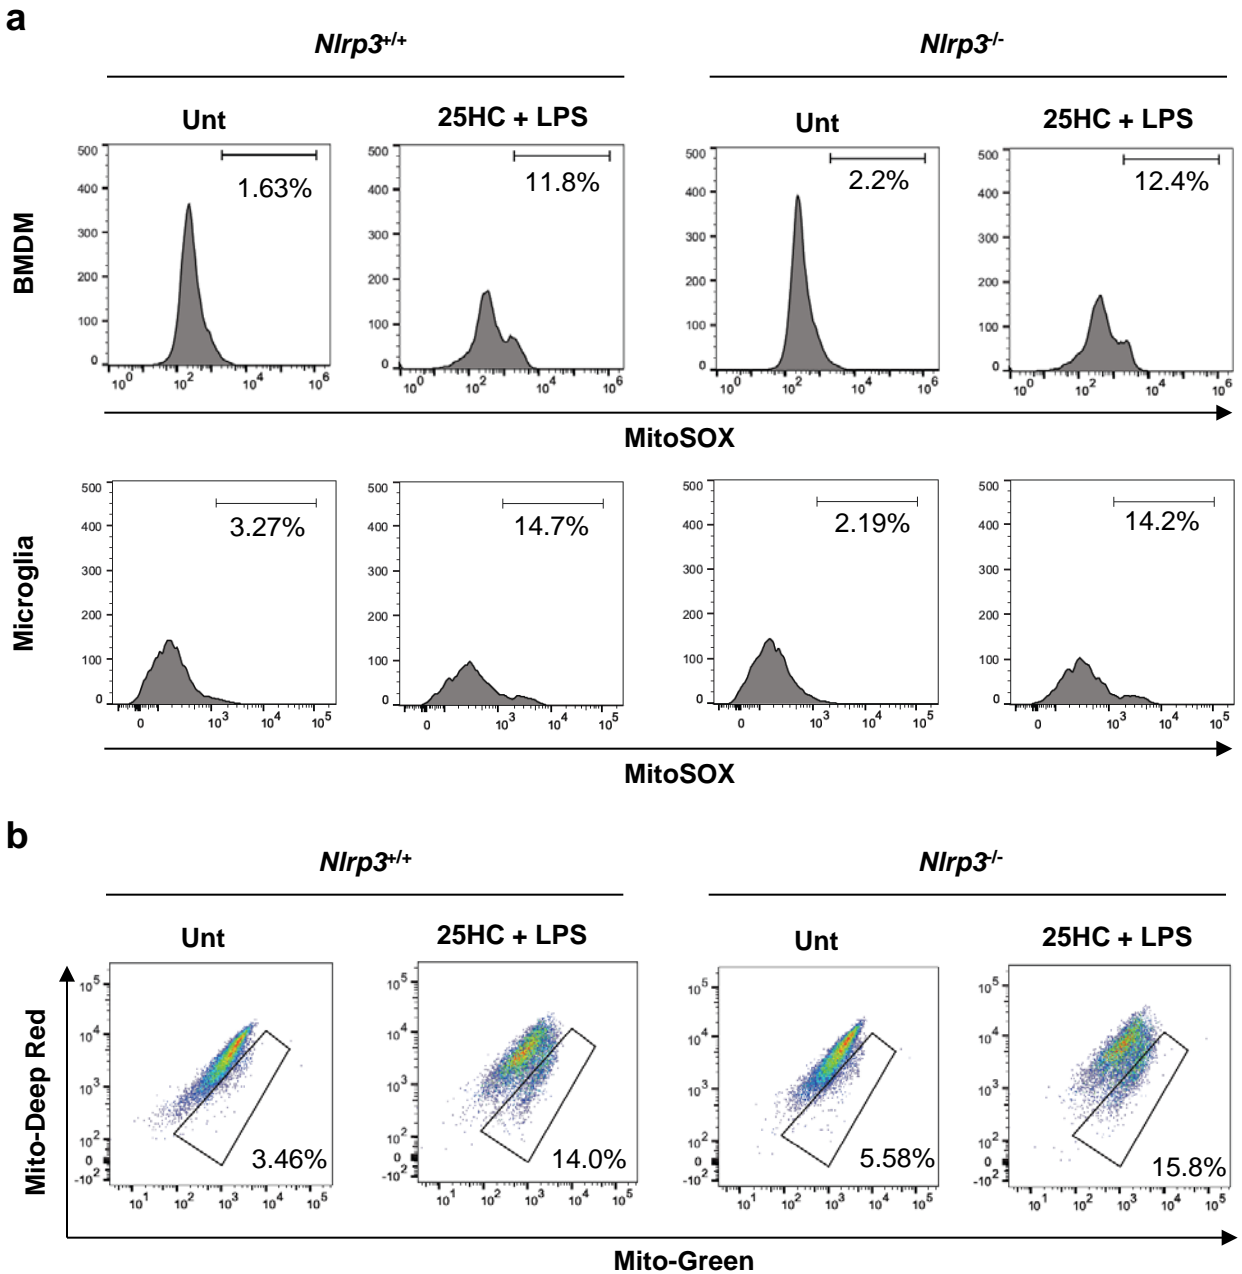

**Supplementary Figure 13. 25-HC induces mitochondrial ROS production and mitochondrial damage in an NLRP3-independent manner.** (a,b) *Nlrp3<sup>+/+</sup>* or *Nlrp3<sup>-/-</sup>* mouse BMDMs (a, upper panel; b) or microglia (a, lower panel) were treated with 25-HC (50  $\mu$ M, 8 h) in the presence of LPS (last 3 h). Cells were stained with MitoSOX (a) or MitoTracker Deep Red and MitoTracker Green (b), and analyzed by flow cytometer. The populations of MitoSOX-positive cells (a) and of damaged mitochondria-containing cells (b) are indicated.

**a**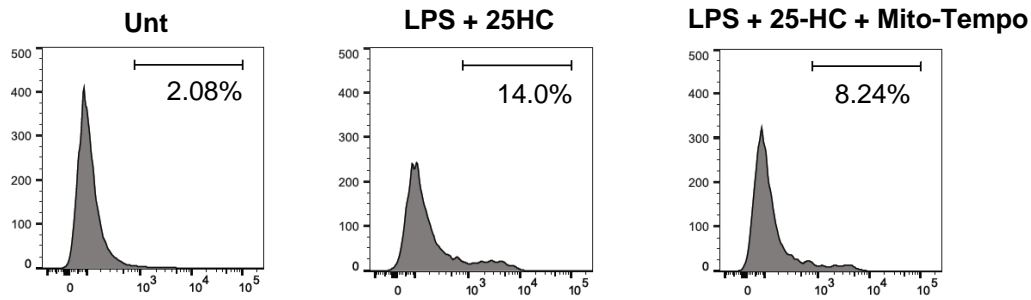**b**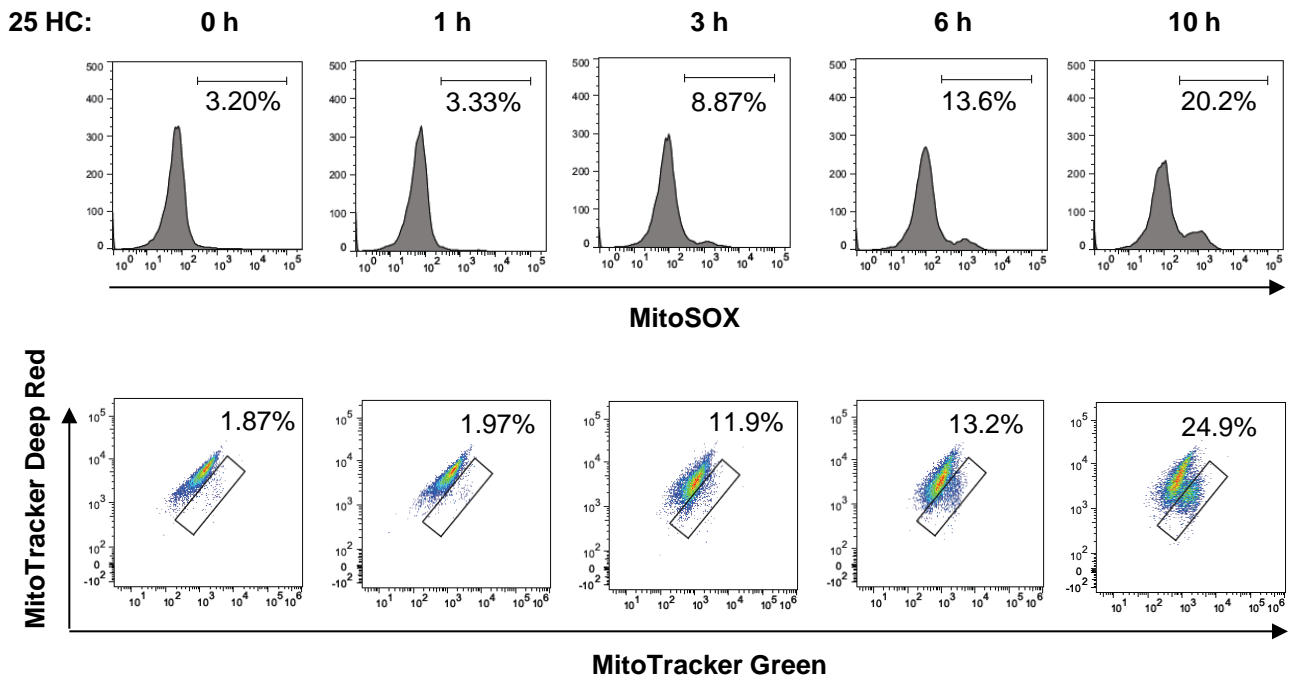

**Supplementary Figure 14. 25-HC induces time-dependent mitochondrial ROS production and mitochondrial damage.** (a) Mouse BMDMs were primed with LPS ( $0.25 \mu\text{g ml}^{-1}$ , 3 h), followed by treatment with 25-HC ( $50 \mu\text{M}$ ) in the presence of Mito-Tempo ( $200 \mu\text{M}$ ) for 6 h. Cells were stained with MitoSOX, then analyzed by flow cytometry. (b) Mouse BMDMs were treated with 25-HC ( $50 \mu\text{M}$ ) for the indicated times (1~10 h) in the presence of LPS ( $0.25 \mu\text{g ml}^{-1}$ , final 1 or 3 h). Cells were then stained with MitoSOX (upper panel) or costained with MitoTracker Deep Red and MitoTracker Green (lower panel), and analyzed by flow cytometry. The populations of MitoSOX-positive cells (upper) and of damaged mitochondria-containing cells (lower) are indicated.

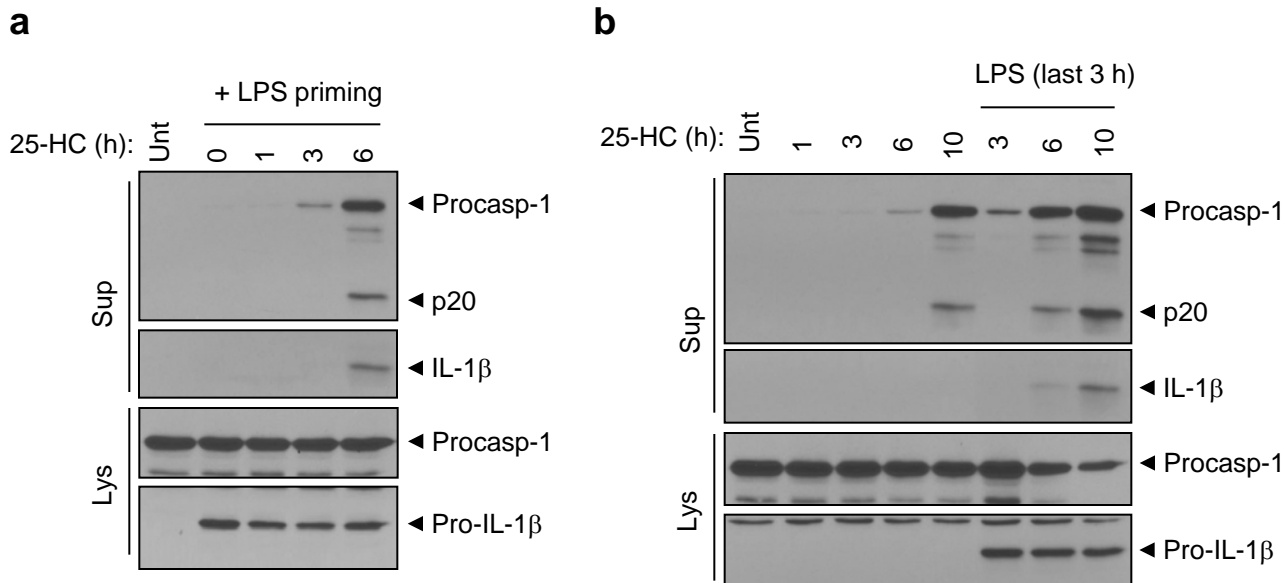

**Supplementary Figure 15. Time-dependent activation of caspase-1 by 25-HC.** (a) Mouse BMDMs were primed with LPS ( $0.25 \mu\text{g ml}^{-1}$ , 3 h), followed by treatment with 25-HC ( $50 \mu\text{M}$ ) for the indicated times (1~6 h). (b) Mouse BMDMs were treated with 25-HC ( $50 \mu\text{M}$ ) for the indicated times in the presence or absence of LPS ( $0.25 \mu\text{g ml}^{-1}$ , final 3 h). (a,b) Culture supernatants (Sup) or cellular lysates (Lys) were immunoblotted with the indicated antibodies.

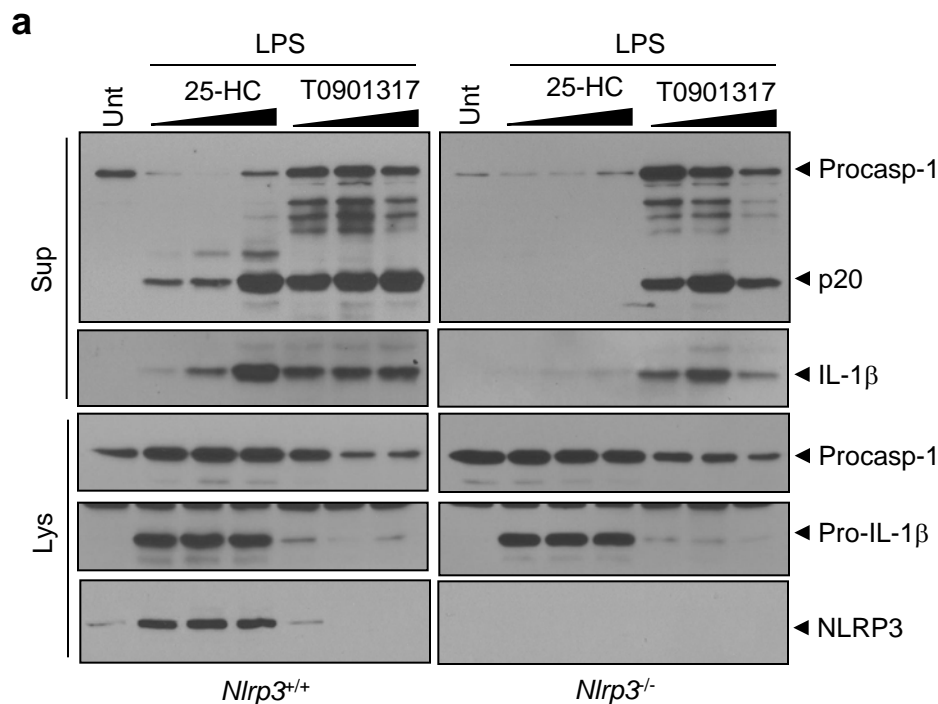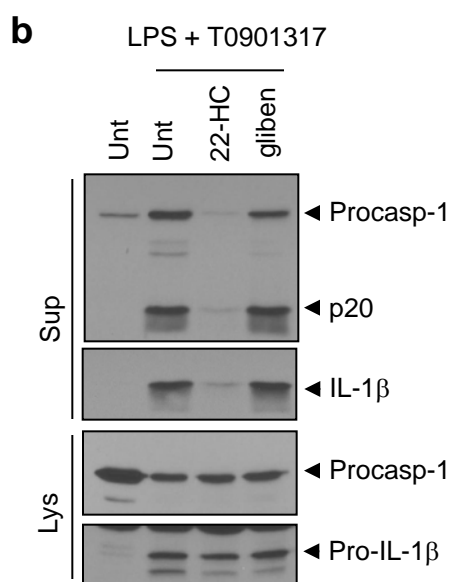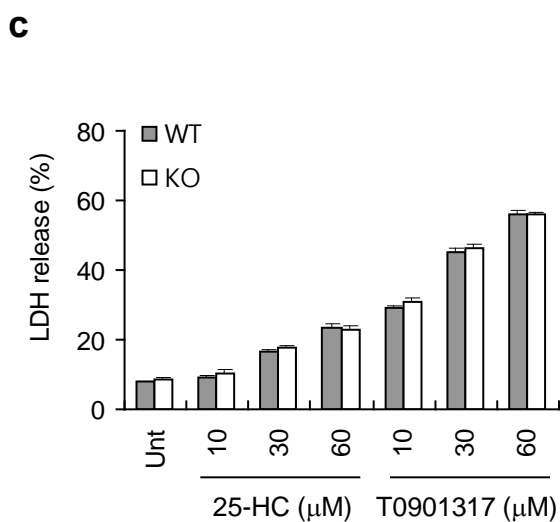

**Supplementary Figure 16. TO901317, a LXR ligand, induces the activation of caspase-1 and IL-1 $\beta$  in an NLRP3-independent manner.** (a) *Nlrp3*<sup>+/+</sup> or *Nlrp3*<sup>-/-</sup> mouse BMDMs were primed with LPS (0.25  $\mu$ g ml<sup>-1</sup>, 3 h), followed by treatment with 25-HC or TO901317 (20–60  $\mu$ M) for 6 h. (b) Mouse BMDMs were primed with LPS (3 h), followed by TO901317 (80  $\mu$ M) in the presence of 22-HC (100  $\mu$ M) or glibenclamide (50  $\mu$ M) for 6 h. (a, b) Culture supernatants (Sup) or cellular lysates (Lys) were immunoblotted with the indicated antibodies. (c) *Nlrp3*<sup>+/+</sup> (WT) or *Nlrp3*<sup>-/-</sup> (KO) mouse BMDMs were primed with LPS (0.25  $\mu$ g ml<sup>-1</sup>, 3 h), followed with the treatment of 25-HC or TO901317 (10–60  $\mu$ M) for 6 h. Cell death was then determined by extracellular release of lactate dehydrogenase (LDH). ( $n = 3$ ).



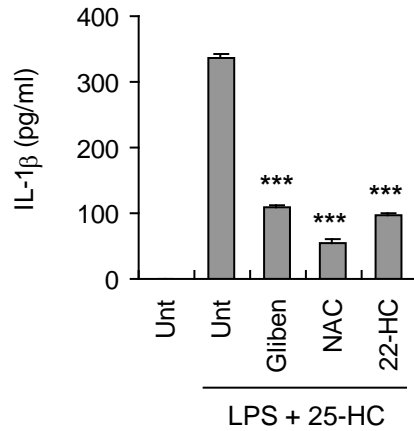

**Supplementary Figure 17. Inhibition of potassium efflux, mitochondrial ROS production, and LXR signaling attenuates the 25-HC-triggered secretion of IL-1 $\beta$ .** Mouse BMDMs were primed with LPS ( $0.25 \mu\text{g ml}^{-1}$ , 3 h), followed by treatment with 25-HC ( $80 \mu\text{M}$ ) in the presence of glibenclamide ( $50 \mu\text{M}$ ), NAC ( $20 \text{mM}$ ), or 22-HC ( $100 \mu\text{M}$ ) for 6 h. The level of IL-1 $\beta$  in the culture supernatants was quantified by ELISA. Asterisks indicate the significant differences compared with the samples treated with LPS + 25-HC (2<sup>nd</sup> lane). \*\*\* $P < 0.001$  ( $n = 3$ )

**a**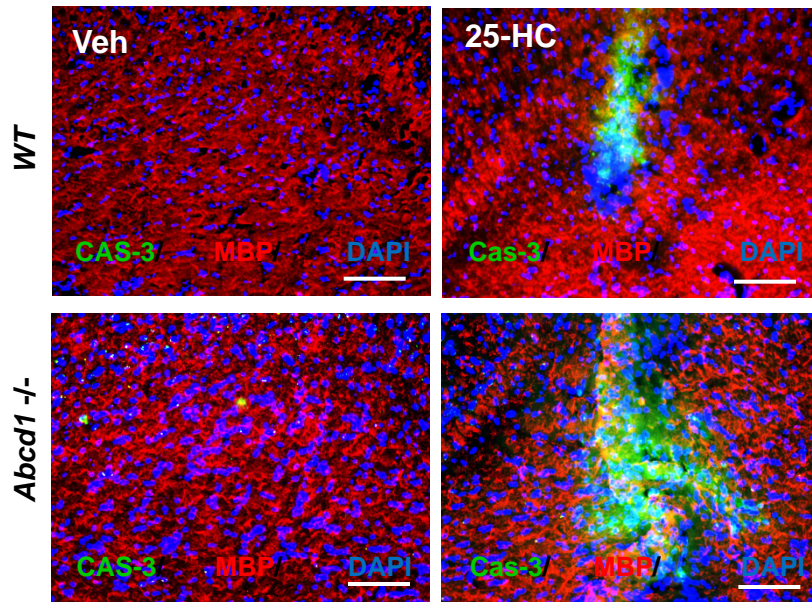**b**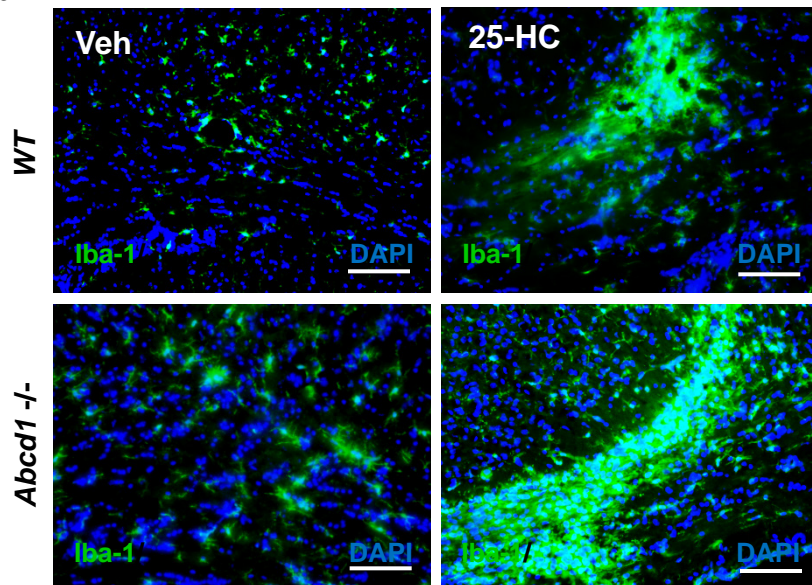**c**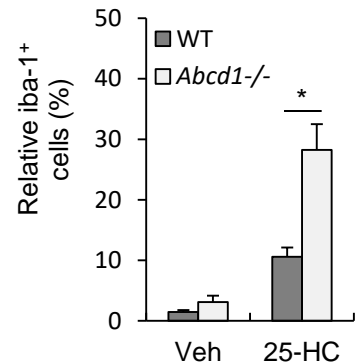

**Supplementary Figure 18. Deficiency of *Abcd1* confers increased susceptibility to stereotaxic injection of 25-HC into mouse brains.** (a) Representative images of brain sections immunostained with anti-active caspase-3 (green), anti-myelin basic protein (MBP, red) antibodies, and DAPI (blue) after bilateral stereotaxic injection of vehicle or 25-HC (100  $\mu$ M) into the brains of *Abcd1*<sup>+/+</sup> (WT) or *Abcd1*<sup>-/-</sup> mice. Scale bars, 100  $\mu$ m. (b) Immunohistochemical staining of coronal brain sections with anti-Iba-1 antibody (green) and DAPI (blue) after bilateral stereotaxic injection of 25-HC (100  $\mu$ M) or vehicle into the brains of *Abcd1*<sup>+/+</sup> (WT) or *Abcd1*<sup>-/-</sup> mice. Scale bars, 100  $\mu$ m. (c) Quantification of Iba-1-positive microglia (green) in the confocal images of vehicle- or 25-HC-injected brains of *Abcd1*<sup>+/+</sup> (WT) or *Abcd1*<sup>-/-</sup> mice. ( $n = 6$ )

**a**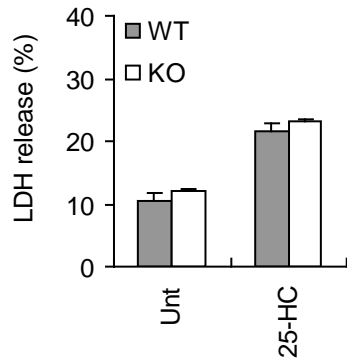**b**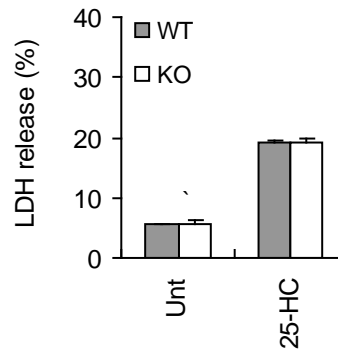

**Supplementary Figure 19. 25-HC induces NLRP3-independent cell death.** (a, b) *Nlrp3*<sup>+/+</sup> (WT) or *Nlrp3*<sup>-/-</sup> (KO) mouse BMDMs (a) or mixed glial cells (b) were treated with 25-HC (80 μM) for 6 h. Cell death was then determined by extracellular release of lactate dehydrogenase (LDH). (*n* = 3)

Supplementary Figure 20. Original full images of immunoblots.

**Figure 4a**

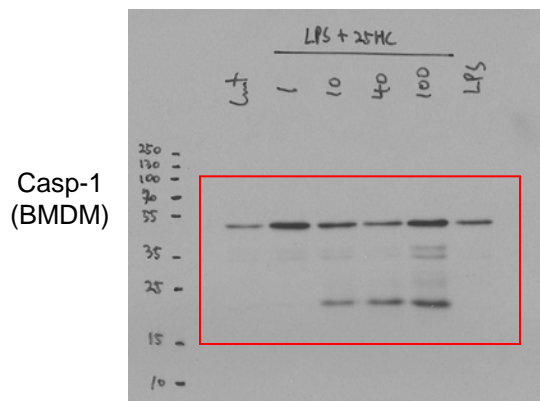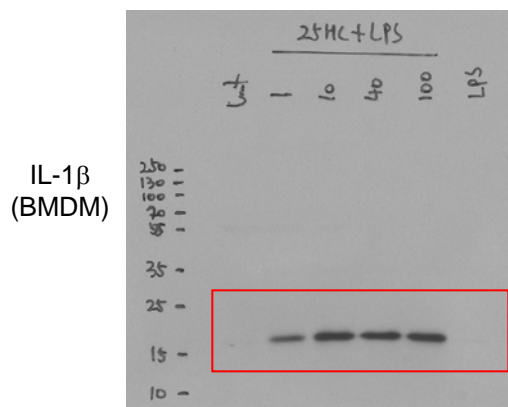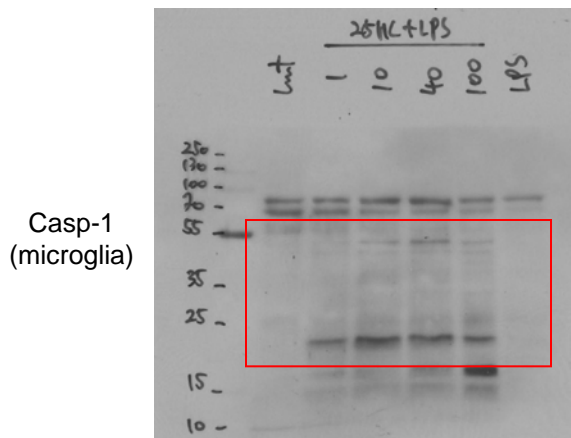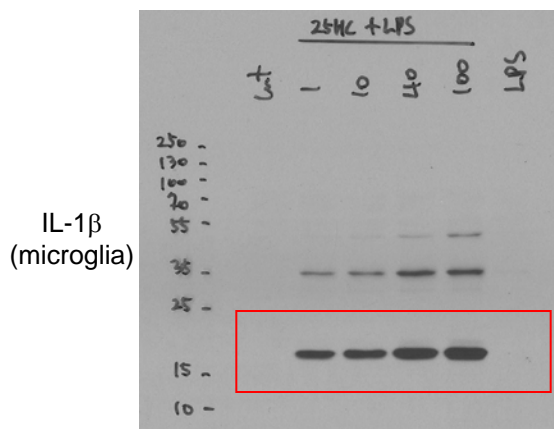

**Figure 4b**

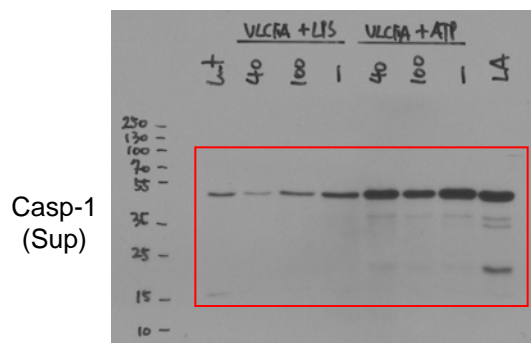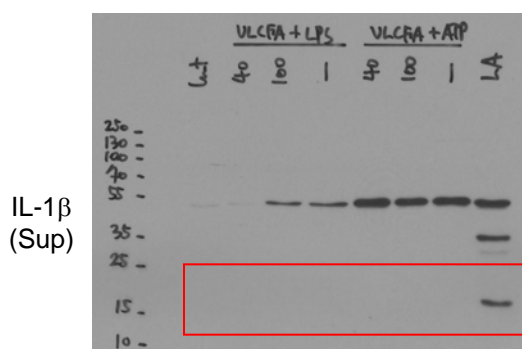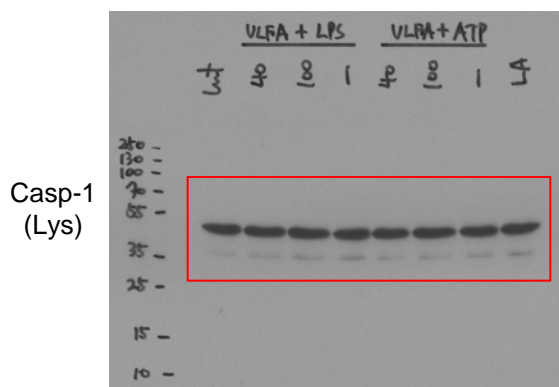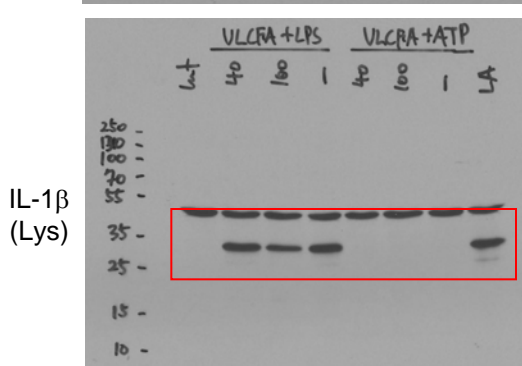

**Figure 4c**

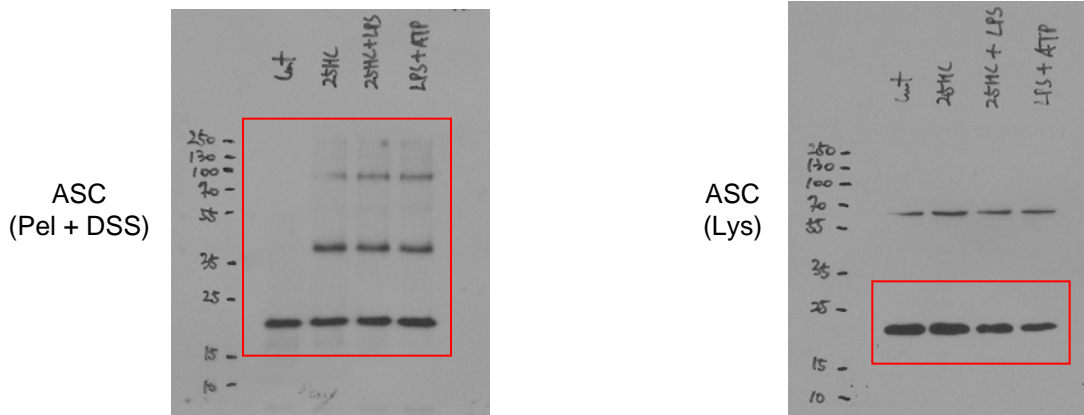

**Figure 4f**

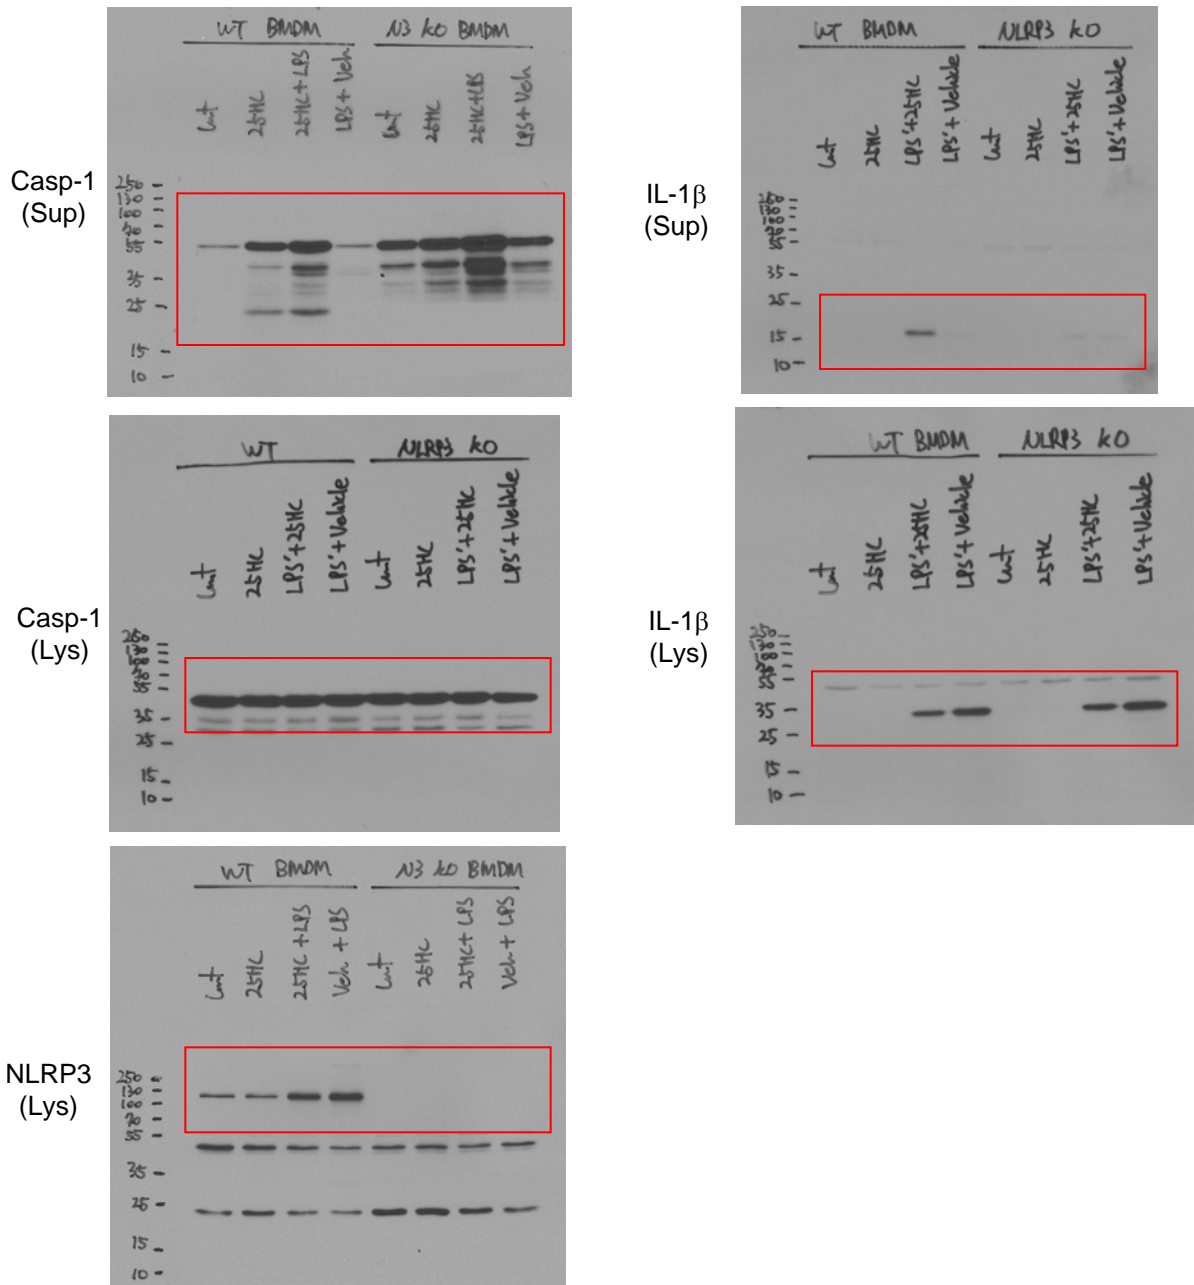

**Figure 4g**

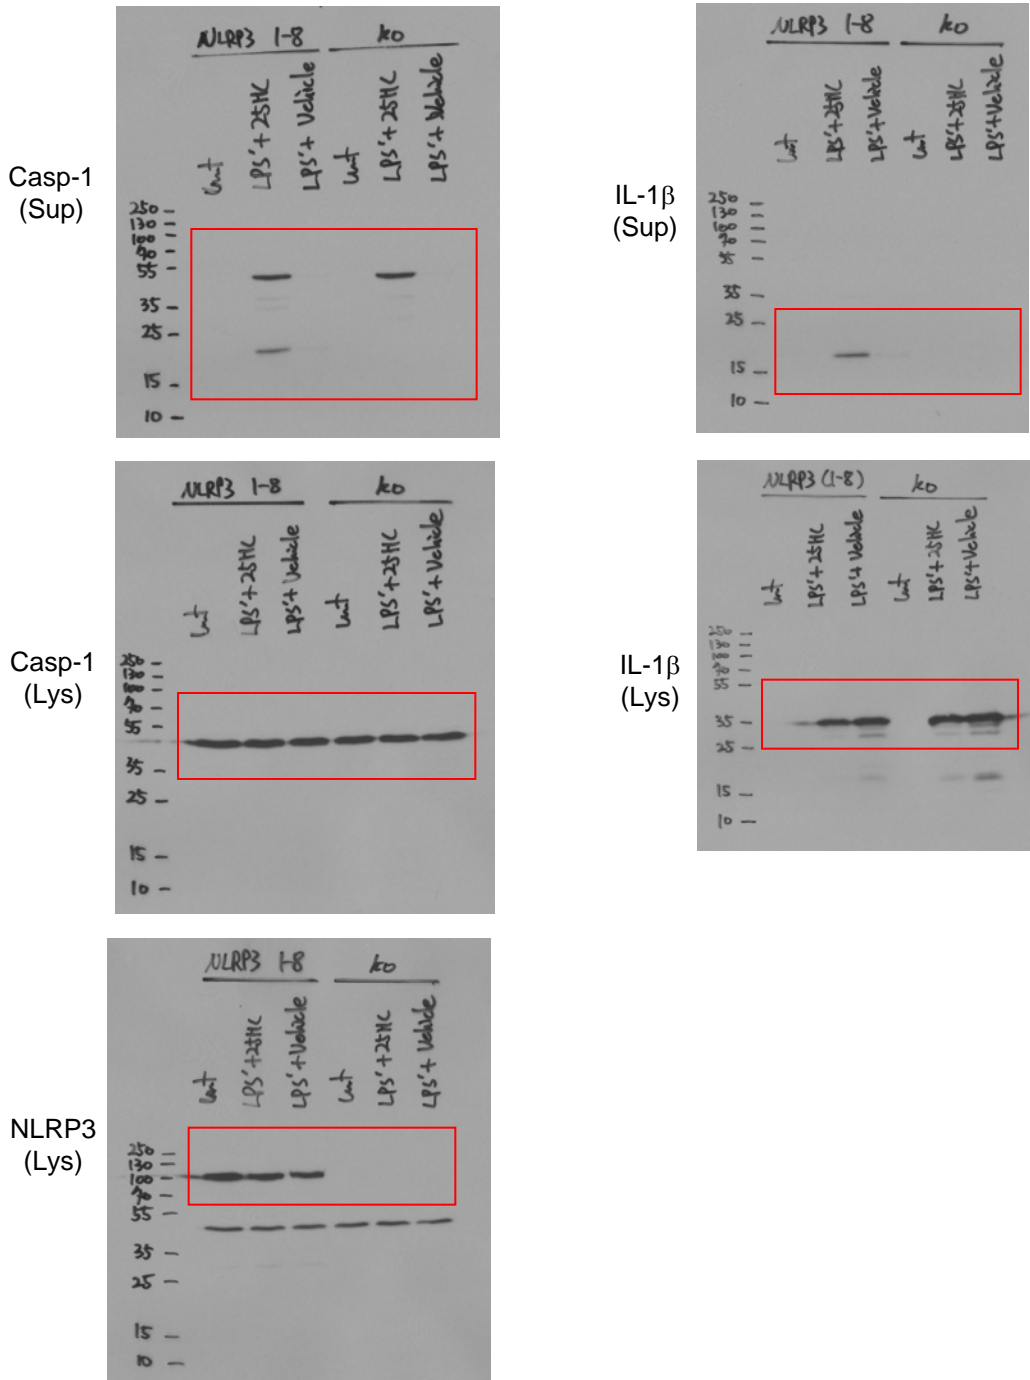



**Figure 5e**

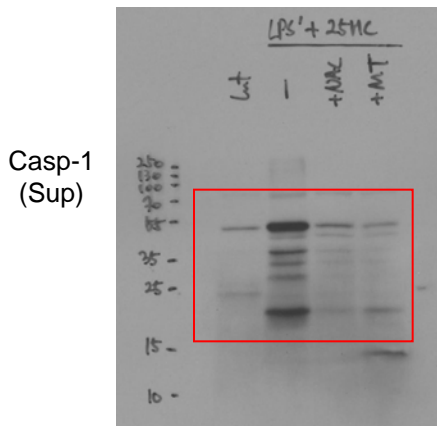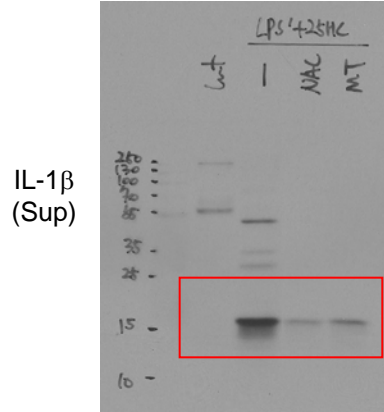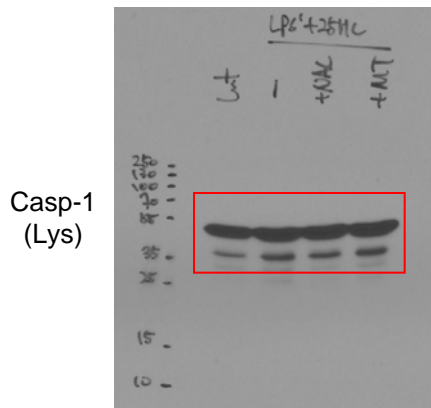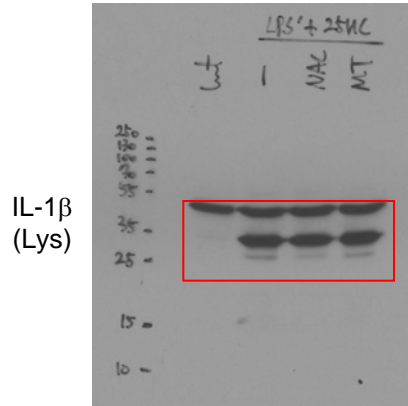

**Figure 5f**

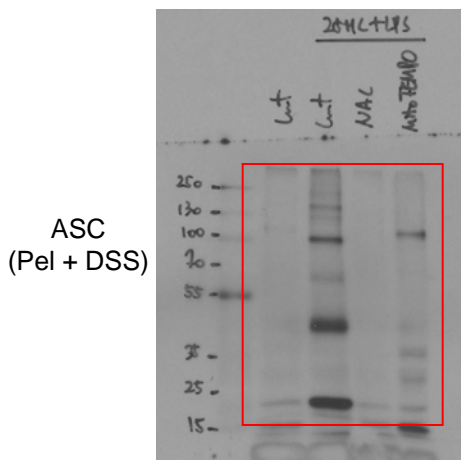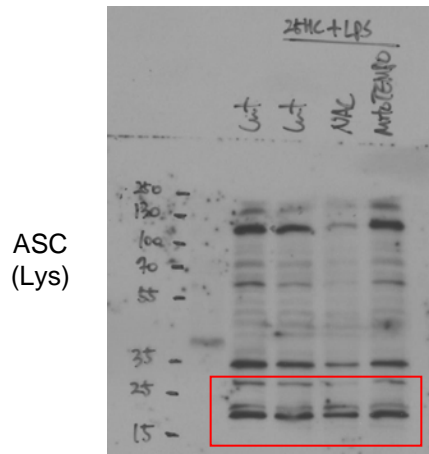



**Figure 5g**

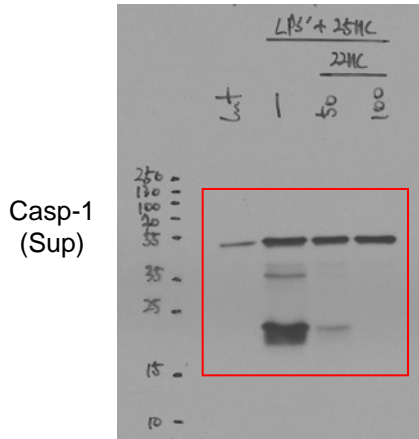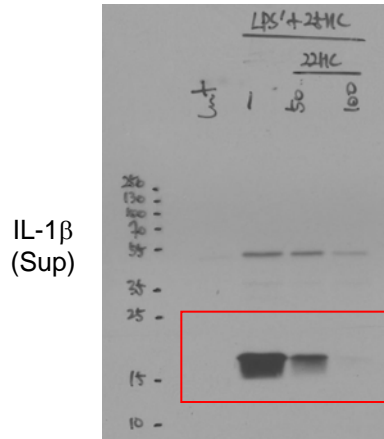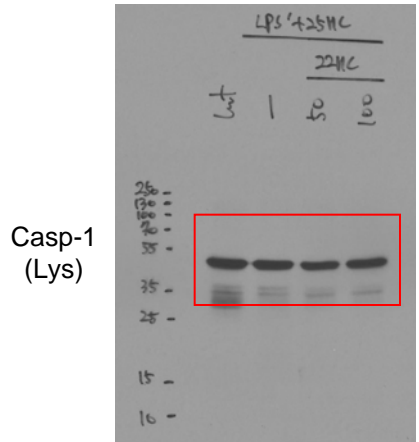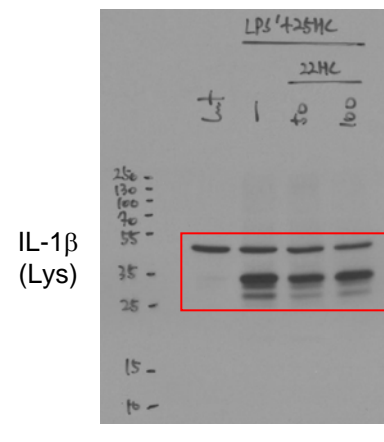

**Figure 5h**

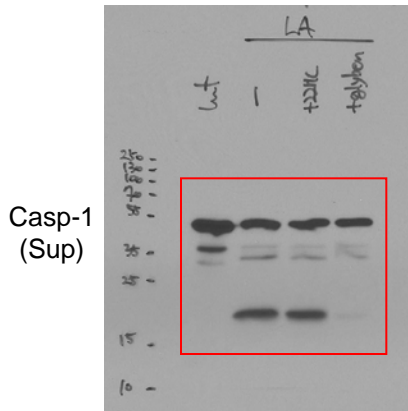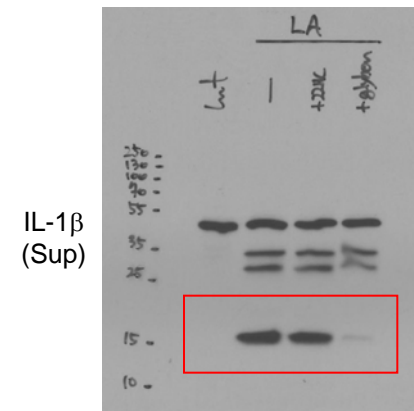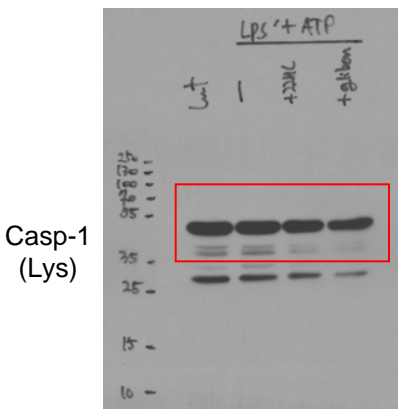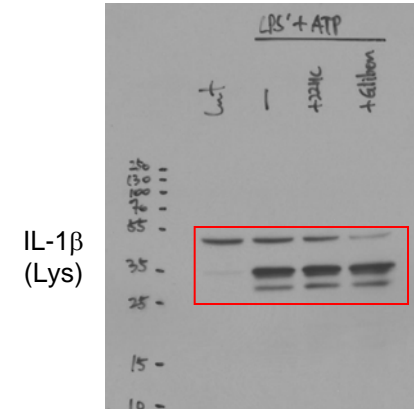

**Figure 5i**

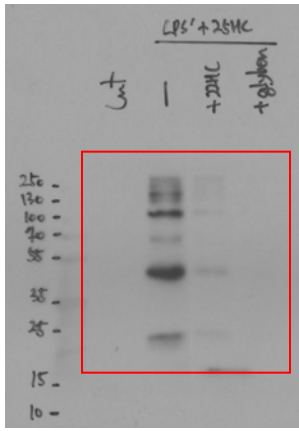

ASC  
(Pel + DSS)

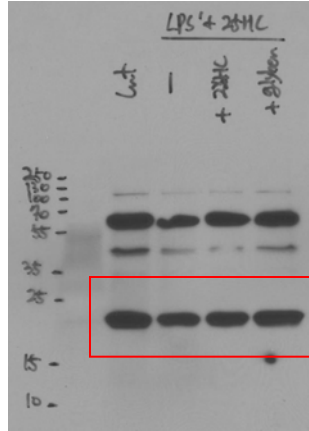

ASC  
(Lys)

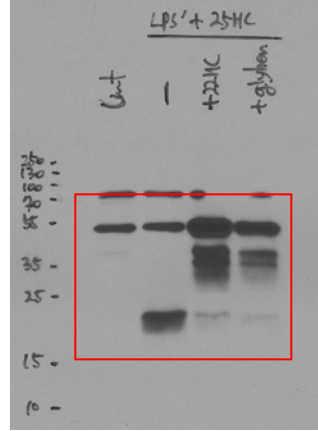

Casp-1  
(Sup)

### Supplementary Figure 7a

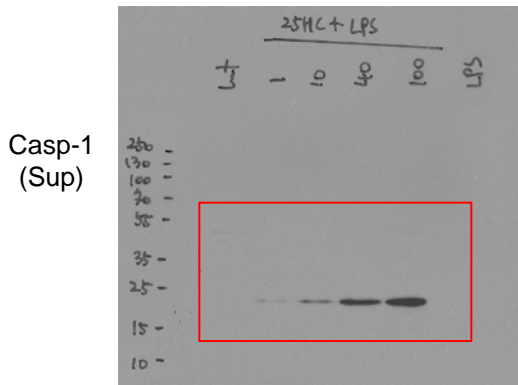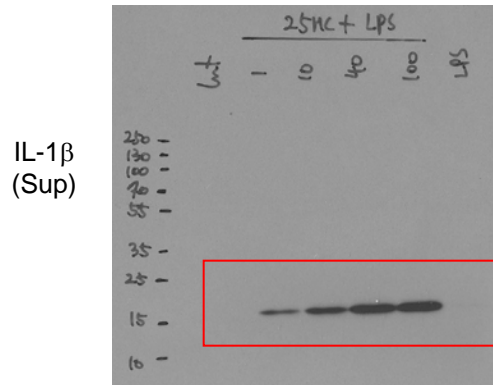

### Supplementary Figure 7b

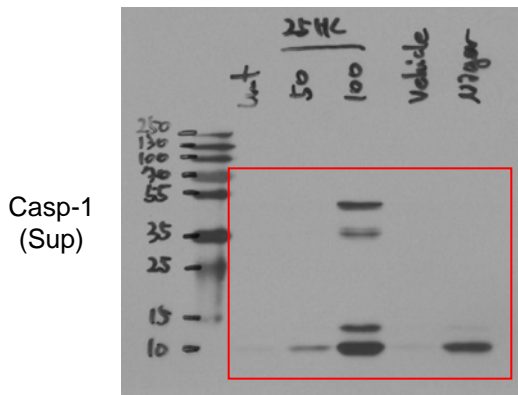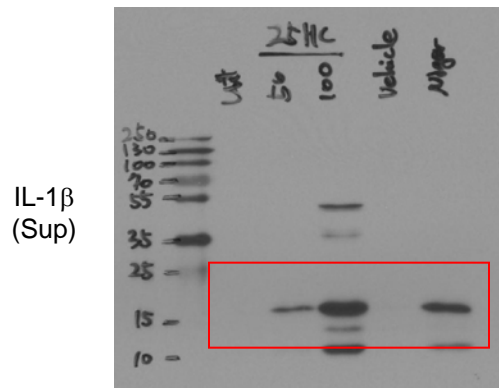

**Supplementary Figure 8a**

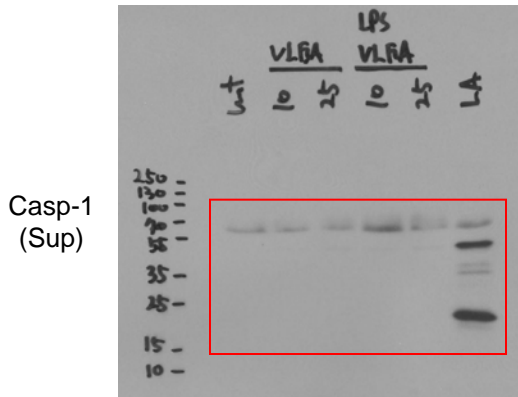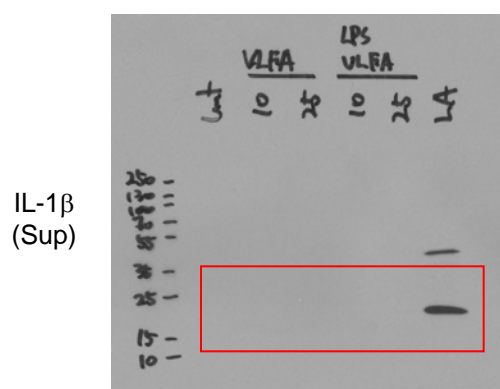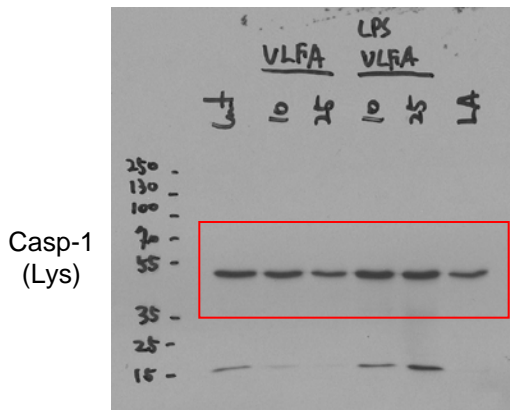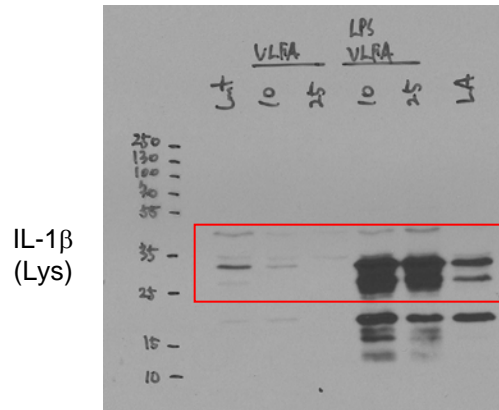

**Supplementary Figure 8b**

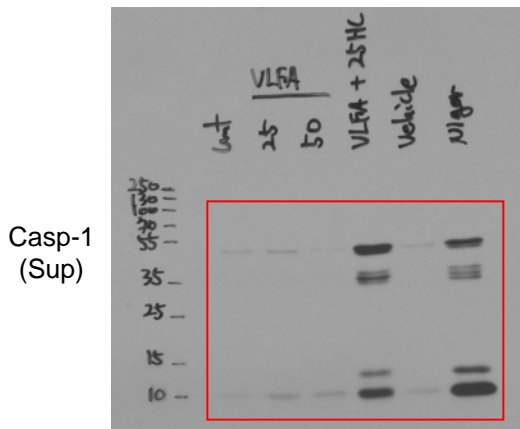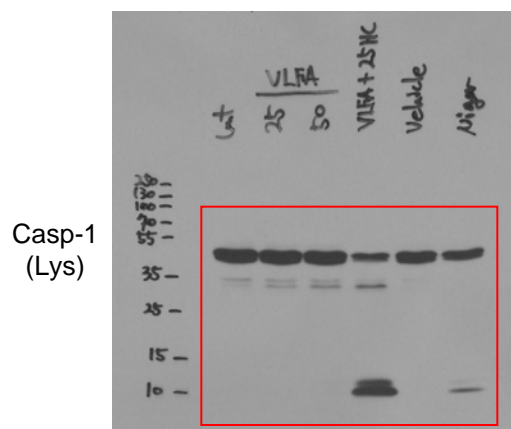

**Supplementary Figure 9b**

Casp-1  
(Sup)

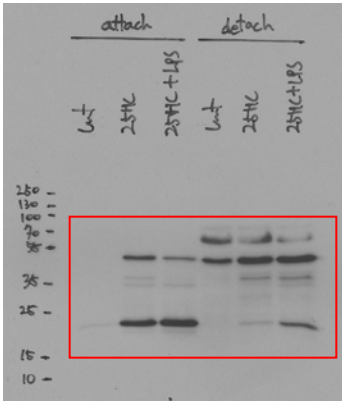

IL-1 $\beta$   
(Sup)

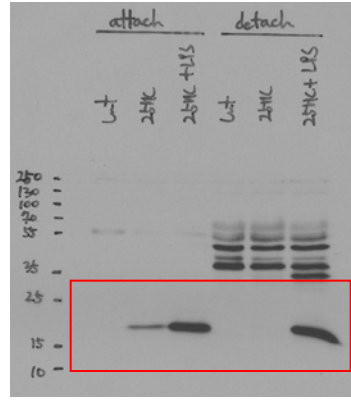

Casp-1  
(Lys)

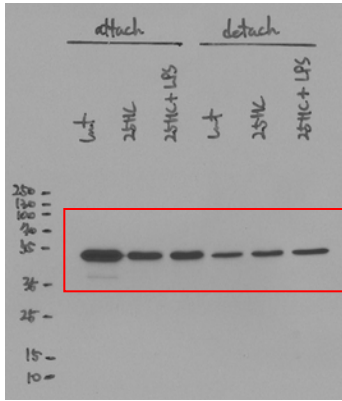

IL-1 $\beta$   
(Lys)

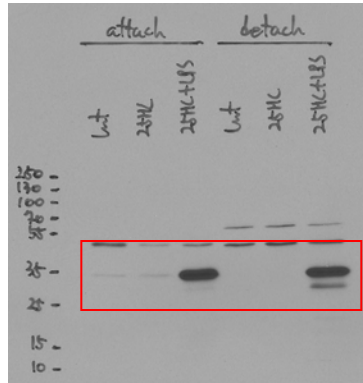

ASC  
(Lys)

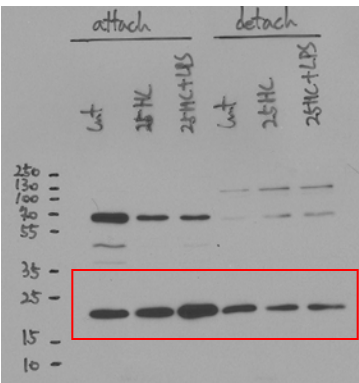

NLRP3  
(Lys)

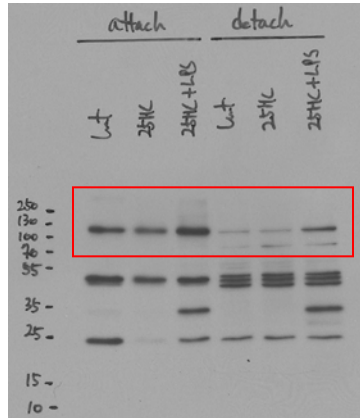

$\beta$ -actin  
(Lys)

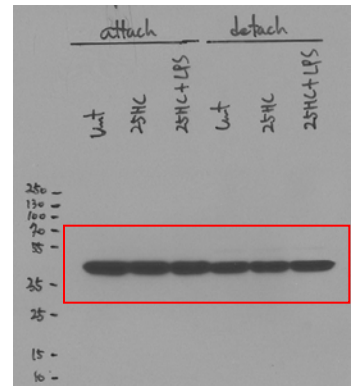

# Supplementary Figure 11a

Casp-1  
(Sup)

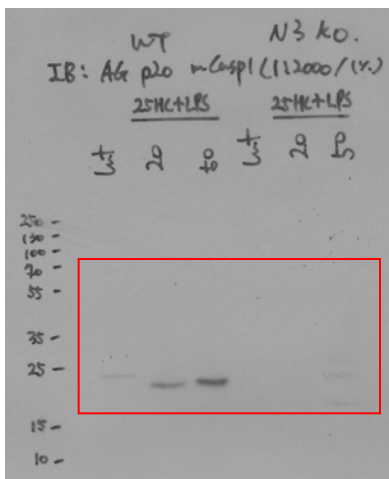

IL-1 $\beta$   
(Sup)

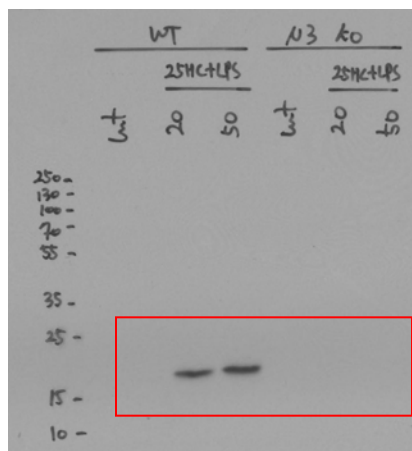

Casp-1  
(Lys)

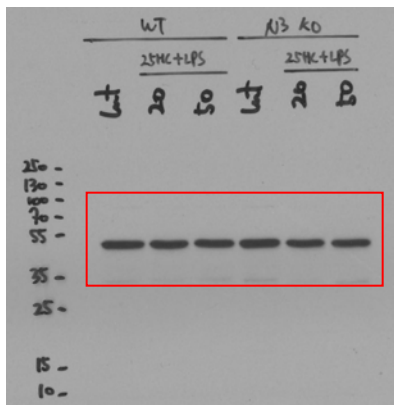

IL-1 $\beta$   
(Lys)

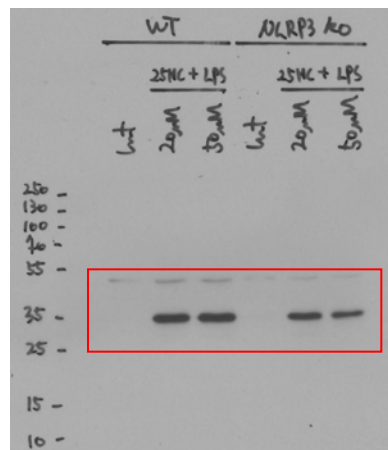

NLRP3  
(Lys)

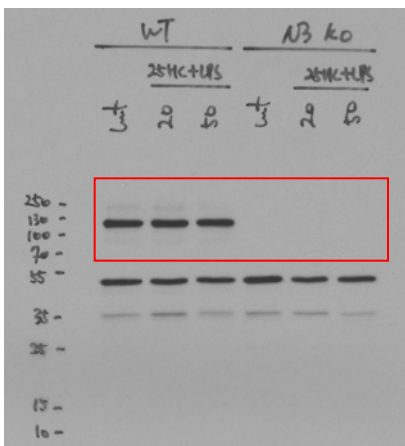

**Supplementary Figure 11b**

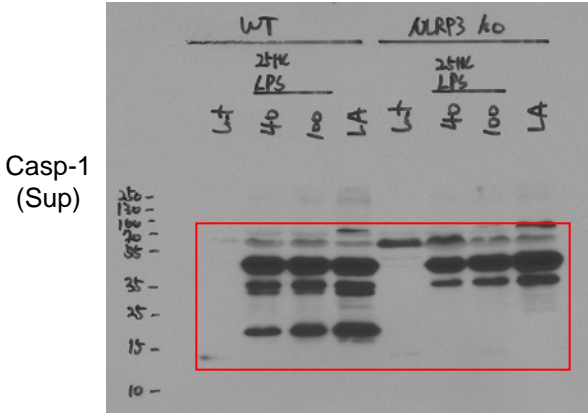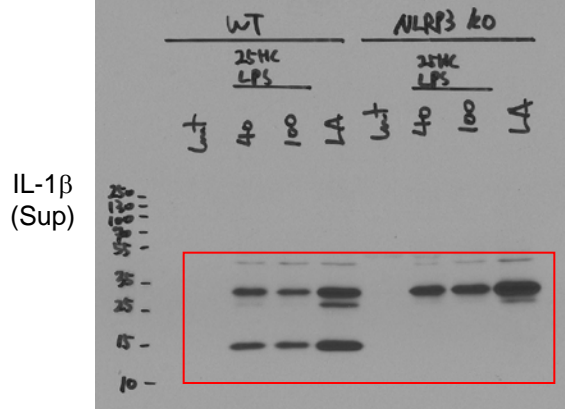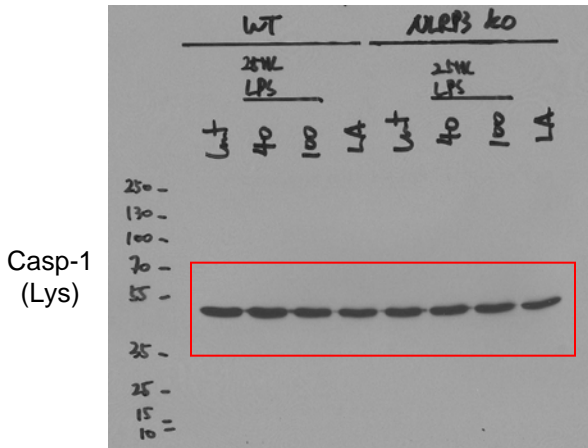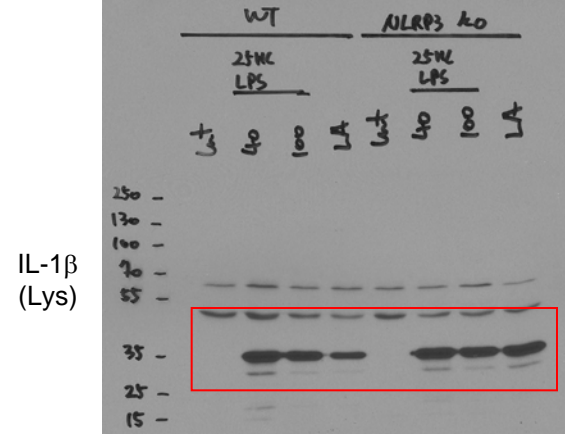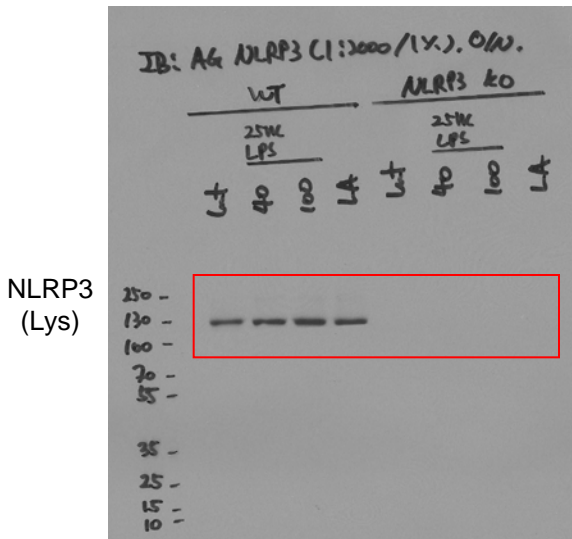

**Supplementary Figure 15a**

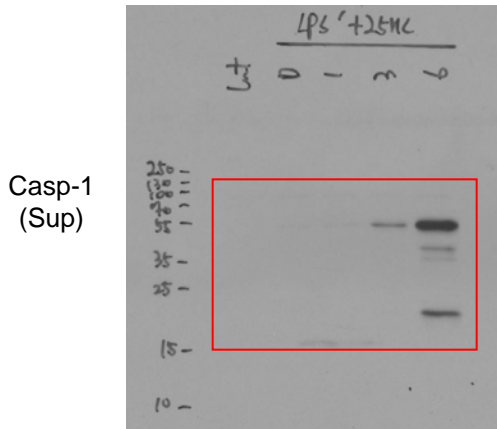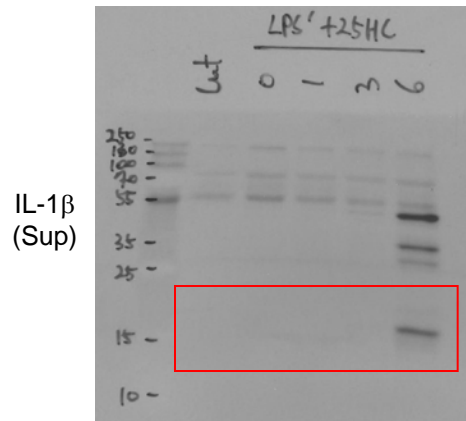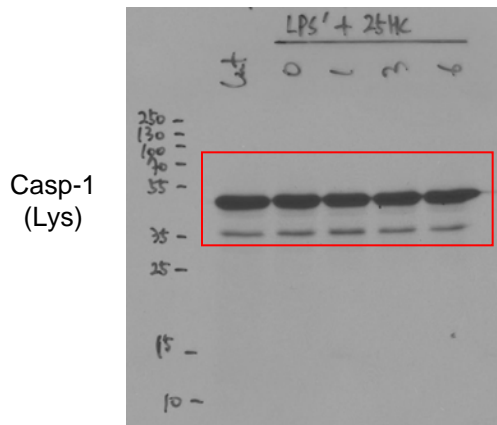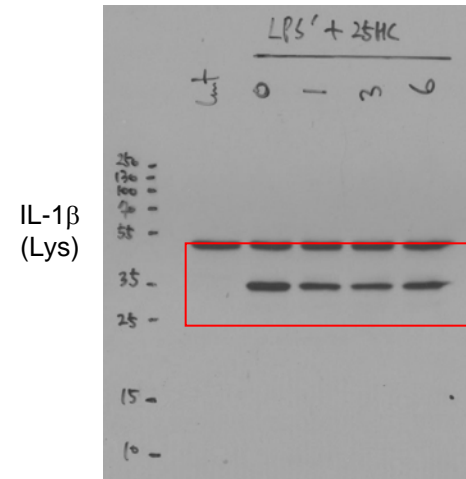



**Supplementary Figure 15b**

Casp-1  
(Sup)

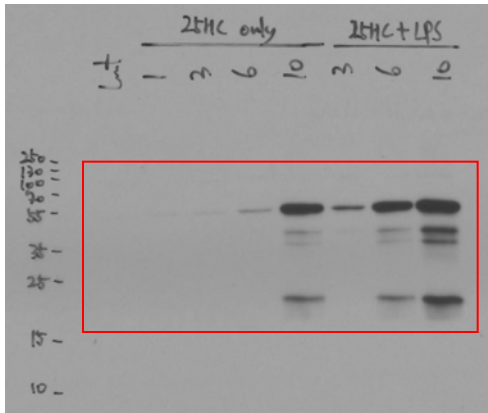

IL-1 $\beta$   
(Sup)

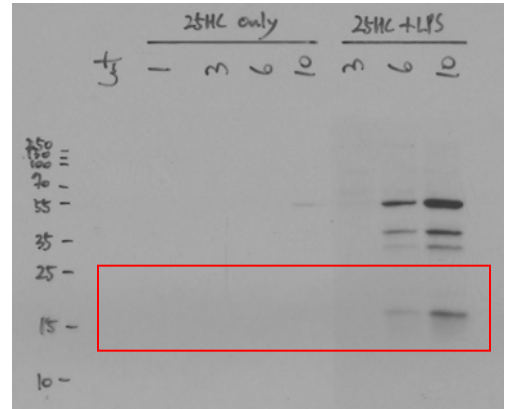

Casp-1  
(Lys)

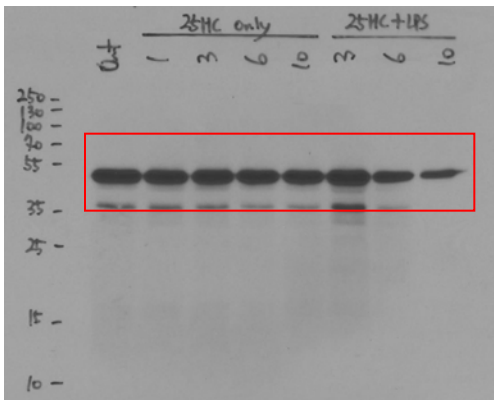

IL-1 $\beta$   
(Lys)

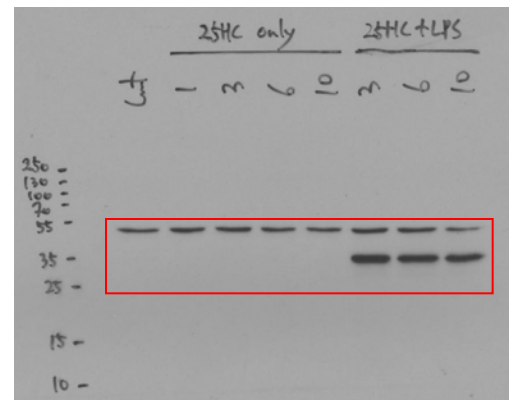

**Supplementary Figure 16a (*Nlrp3*<sup>+/+</sup>)**

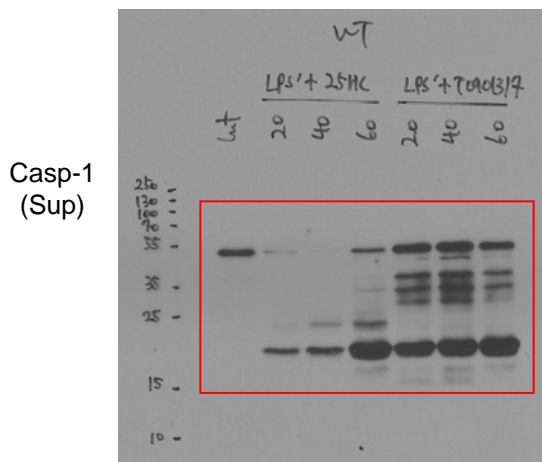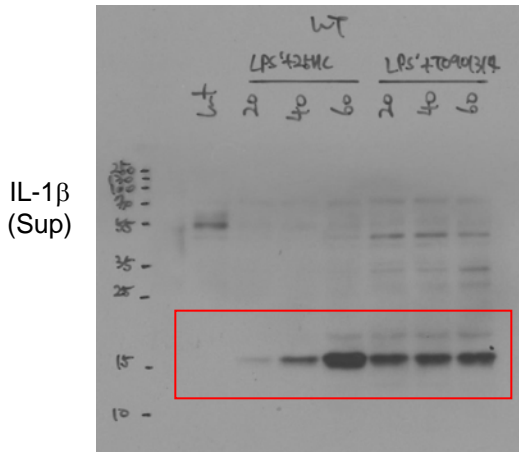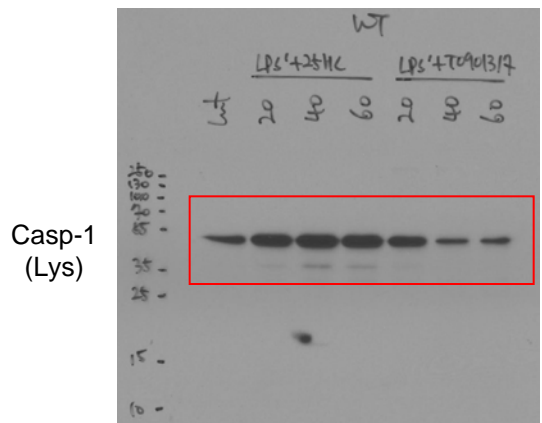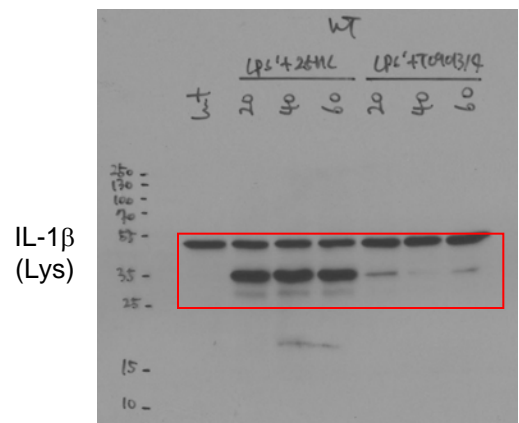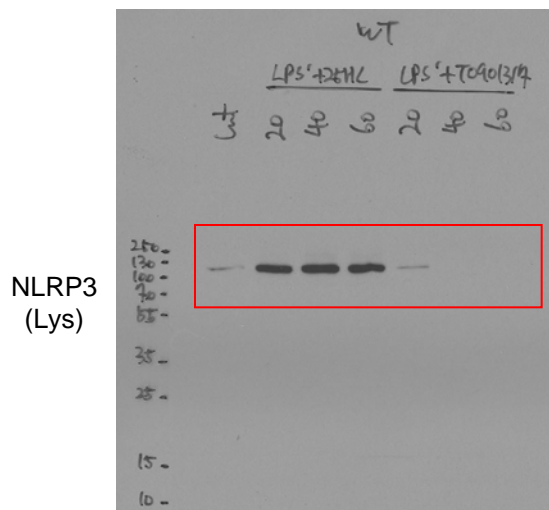

**Supplementary Figure 16a (*Nlrp3*<sup>-/-</sup>)**

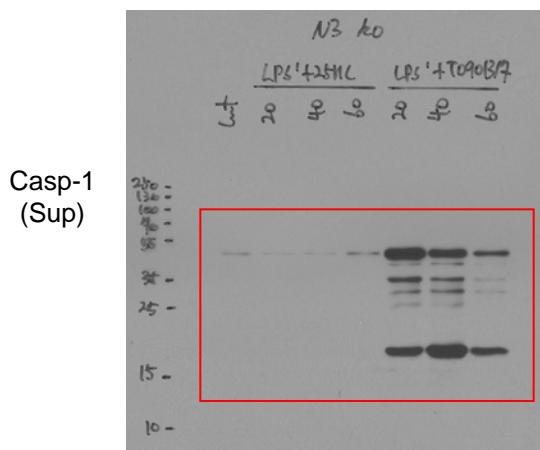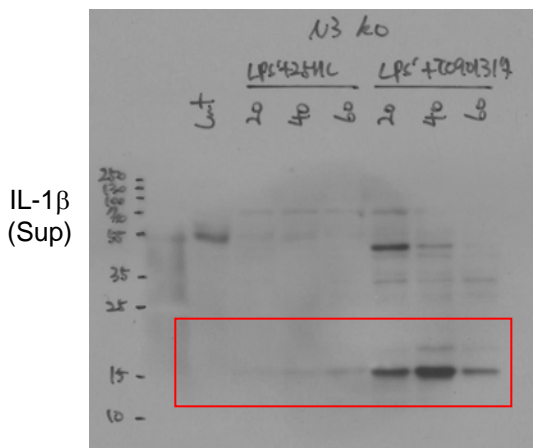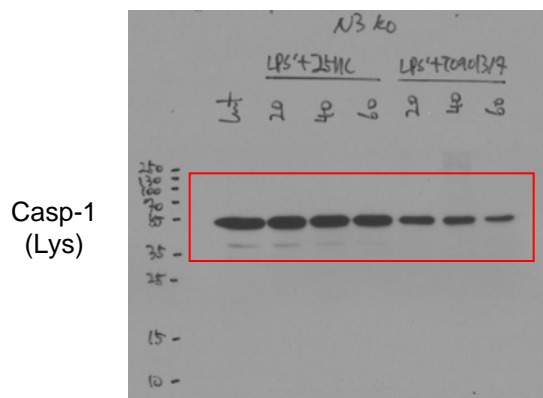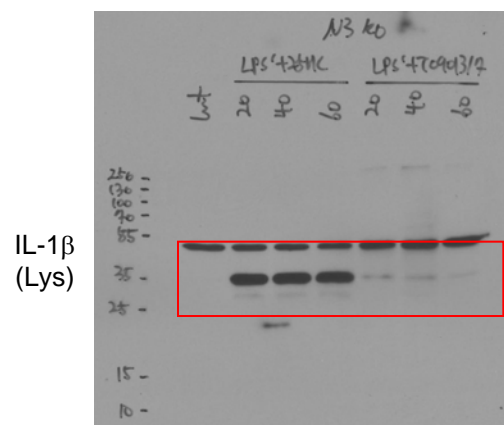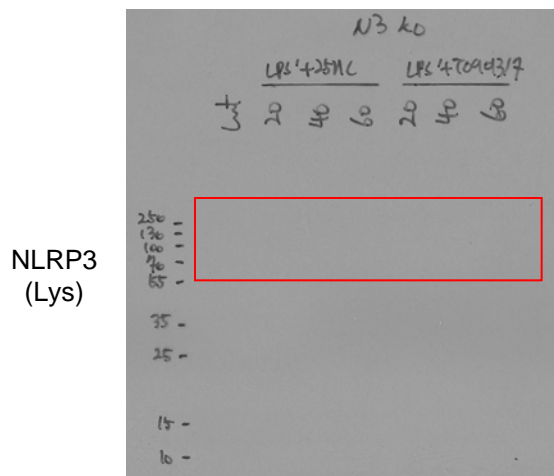

**Supplementary Figure 16b**

Casp-1  
(Sup)

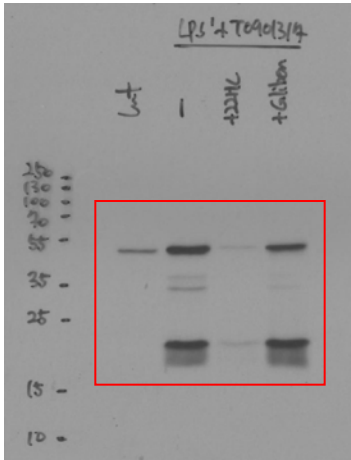

IL-1 $\beta$   
(Sup)

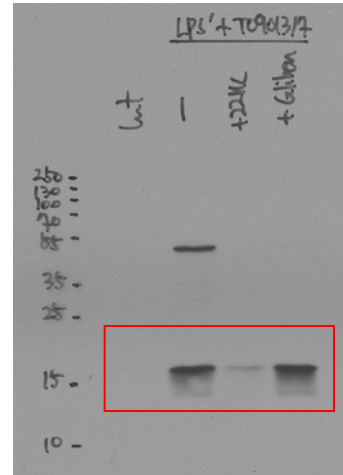

Casp-1  
(Lys)

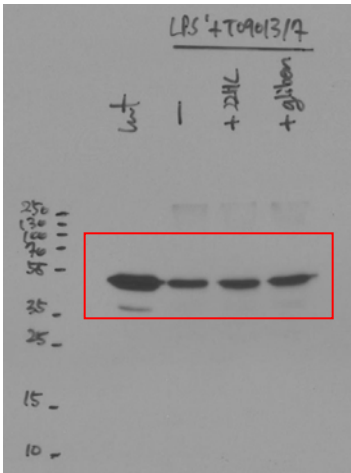

IL-1 $\beta$   
(Lys)

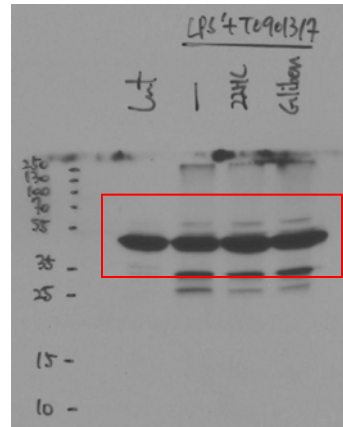

**Supplementary Table 1. Microarray analysis of oxysterol-producing enzymes in the AMN- or CCALD-iPSCs.**

|                       | AMN-iPSCs/Control-iPSCs |                 | CCALD-iPSCs/Control-iPSCs |                 |
|-----------------------|-------------------------|-----------------|---------------------------|-----------------|
|                       | Fold Change             | <i>p</i> -value | Fold Change               | <i>p</i> -value |
| <b><i>CYP46A1</i></b> | -1.010071               | 0.7399682       | -1.281197                 | 0.02891906      |
| <b><i>CYP27A1</i></b> | 1.120609                | 0.5171332       | 1.144407                  | 0.2783103       |

**Supplementary Table 2. Clinical information of X-ALD patients.**

|                            | Race       | Age (YR) | Sex | Phenotypic data                                                                                                                                                                                                                                                                                                                                                                                                                                                                                                                                                                                                             |
|----------------------------|------------|----------|-----|-----------------------------------------------------------------------------------------------------------------------------------------------------------------------------------------------------------------------------------------------------------------------------------------------------------------------------------------------------------------------------------------------------------------------------------------------------------------------------------------------------------------------------------------------------------------------------------------------------------------------------|
| CCALD 1 (GM04496)          | Caucasian  | 6        | M   | High proportion of fatty acids with a chain length of 26 found in fibroblasts; autopsy pathological findings in both the adrenal and central nervous system were those of ALD                                                                                                                                                                                                                                                                                                                                                                                                                                               |
| CCALD 2 (Korean Patient-1) | Korean     | 28       | M   | Elevated C26:C22 fatty acid ratio in plasma; impaired auditory discrimination and difficulties in vision at the age of 8; primary involvement of the occipital white matter; progressive manifestations of both the adrenal and central nervous system were those of CCALD; a point mutation in intervening sequence 4 (-2a > g) (c.1394-2A>G(IVS4(-2)A>G))                                                                                                                                                                                                                                                                 |
| CCALD 3 (GM04934)          | Caucasian  | 7        | M   | Elevated C26:C22 fatty acid ratio in fibroblasts and plasma                                                                                                                                                                                                                                                                                                                                                                                                                                                                                                                                                                 |
| CCALD 4 (GM04932)          | Polynesian | 10       | M   | Maori tribe, New Zealand; many affected individuals in pedigree; elevated C26: C22 fatty acid ratio in fibroblasts; no clinical evidence of adrenal insufficiency; only microscopic evidence observed at autopsy                                                                                                                                                                                                                                                                                                                                                                                                            |
| AMN 1 (Korean Patient-2)   | Korean     | 24       | M   | Elevated C26:C22 fatty acid ratio in plasma; MRI of the brain was normal; slowly progressive peripheral axonopathy; was wheel chair bound by the age of 23; clinical course characteristic of adrenomyeloneuropathy                                                                                                                                                                                                                                                                                                                                                                                                         |
| AMN 2 (GM07675)            | Caucasian  | 22       | M   | Adrenomyeloneuropathy; neurologically normal until the age of 20; urinary tract dysfunction and mild spasticity in legs since the age of 22; abnormal EEG with posterior slowing; elevated levels of C26 fatty acids in plasma and fibroblasts; positive family history                                                                                                                                                                                                                                                                                                                                                     |
| AMN 3 (GM17819)            | Caucasian  | 32       | M   | Clinically affected; skin biopsy taken from the forearm; presented with adrenal insufficiency at the age of 24; slow decline in motor function with spastic weakness in the lower limbs associated with loss of vibration sense; MRI of the brain at the age of 30 was normal; began using a cane at the age of 28 and was wheel chair bound by the age of 30; clinical course characteristic of adrenomyeloneuropathy; mother and maternal grandmother are carriers; Southern blot analysis indicated that the donor subject has a deletion of exons 8-10 in the ATP-binding cassette, subfamily D, member 1 (ABCD1) gene. |
